# Supplementary material for: Potential solutions for screening, triage, and severity scoring of suspected COVID-19 positive patients in low-resource settings: a scoping review
Source: HighWire-hosted journal article supplement (doi:10.1136/bmjopen-2020-046130), 2021-09-01
Supplement: bmjopen-2020-046130supp001_data_supplement.pdf [file bmjopen-2020-046130supp001_data_supplement.pdf]

## Appendix 1: Search strategy

**Search limits:** 01 December 2019 to 01 April 2021, English only, publications only

Search terms:

The initial search terms included the following, formatted to the following databases:

- (COVID-19 OR SARS-CoV-2) AND (Triage OR Screening OR Risk OR Severity) AND (Stratification OR Prediction OR Tool OR Index or Score)

Given the rapid and logarithmic number of articles on Covid, an updated search led to the inclusion of the following terms specific to emergency care in order to refine the initial articles screened for review.

- ("emergency responders" OR "emergency medical services" OR "emergency treatment" OR "emergency medicine" OR "ambulances" OR "critical care" OR "shock" OR "sepsis" OR "wounds and injuries" OR "pregnancy complications" OR "emergency responder" OR "emergency responders" OR "emergency doctor" OR "emergency doctors" OR "emergency clinician" OR "emergency clinicians" OR "emergency physician" OR "emergency physicians" OR "emergency personnel" OR "emergency medical personnel" OR "emergency service" OR "emergency services" OR "emergency medical service" OR "emergency medical services" OR "emergency medicine" OR "emergency health service" OR "emergency health services" OR "emergency care" OR "emergency healthcare" OR "emergency treatment" OR "emergency treatments" OR "emergency department" OR "emergency departments" OR "emergency room" OR "emergency rooms" OR "emergency ward" OR "emergency wards" OR "emergency unit" OR "emergency units" OR "emergency hospital" OR "emergency hospitals" OR "emergency clinic" OR "emergency clinics" OR "emergency setting" OR "emergency staff" OR "emergency response" OR "emergency medical technician" OR "emergency medical technicians" OR "paramedic" OR "paramedics" OR "ambulance" OR "ambulances" OR "ER" OR "first responder" OR "first responders" OR "rescue work" OR "rescue worker" OR "rescue workers" OR "relief work" OR "relief worker" OR "relief workers" OR "firefighter" OR "firefighters" OR "fire fighter" OR "fire fighters" OR "trauma center" OR "trauma centers" OR "trauma unit" OR "trauma units" OR "critical care" OR "critical illness" OR "critical illnesses" OR "resuscitation" OR "shock" OR "sepsis" OR "septicemia" OR "septicaemia" OR "acute care" OR "acute disease" OR "acute diseases" OR "prehospital" OR "pre hospital" OR "wound" OR "wounds" OR "triage" OR "pregnancy complication" OR "pregnancy complications" OR "obstetric complication" OR "obstetric complications" OR "obstetric emergency" OR "obstetric emergencies")

Table 1. Total number of unique articles for initial screening

| Database       | Number of articles |
|----------------|--------------------|
| Embase         | 7591               |
| Ovid/Medline   | 587                |
| PubMed         | 4206               |
| Web of Science | 2848               |
