# Supplementary material for: Potential solutions for screening, triage, and severity scoring of suspected COVID-19 positive patients in low-resource settings: a scoping review
Source: HighWire-hosted journal article supplement (doi:10.1136/bmjopen-2020-046130), 2021-09-01
Supplement: bmjopen-2020-046130supp002_data_supplement.pdf [file bmjopen-2020-046130supp002_data_supplement.pdf]

## Appendix 2: Supplementary Tables

**Supplementary Table 1: Screening tool study characteristics (n=57).**

| Title                                                                                                                                                                          | First author                               | Year | Study location        | Study setting income level | Study setting                     | Age group     | No. tool inputs | Has the tool been proposed or implemented? |
|--------------------------------------------------------------------------------------------------------------------------------------------------------------------------------|--------------------------------------------|------|-----------------------|----------------------------|-----------------------------------|---------------|-----------------|--------------------------------------------|
| Preparing for emerging respiratory pathogens such as SARS-CoV, MERS-CoV, and SARS-CoV-2(1)                                                                                     | Al-Tawfiq                                  | 2020 | Dhahran, Saudi Arabia | High-income                | Not specified                     | All ages      | 7               | Proposed                                   |
| Correlation Between the COVID-19 Respiratory Triage Score and SARS-COV-2 PCR Test(2)                                                                                           | Aldobyany                                  | 2020 | Makkah, Saudi Arabia  | High-income                | Not specified                     | Not specified | 14              | Implemented                                |
| Guidance for building a dedicated health facility to contain the spread of the 2019 novel coronavirus outbreak(3)                                                              | Argawal                                    | 2020 | Pune, India           | Lower-middle-income        | Not specified                     | Not specified | 4               | Proposed                                   |
| Rapid response infrastructure for pandemic preparedness in a tertiary care hospital: lessons learned from the COVID-19 outbreak in Cologne, Germany, February to March 2020(4) | Augustin                                   | 2020 | Cologne, Germany      | High-income                | Not specified                     | Not specified | 3               | Implemented                                |
| Adoption of COVID-19 triage strategies for low-income settings(5)                                                                                                              | Ayebare                                    | 2020 | Uganda                | Low-income                 | Outpatient / general practitioner | Not specified | 6               | Proposed                                   |
| Development, evaluation, and validation of machine learning models for COVID-19 detection based on routine blood tests(6)                                                      | Cabitza                                    | 2021 | Italy                 | High-income                | Hospital                          | Not specified | 23              | Proposed                                   |
| Hospital Emergency Management Plan During the COVID-19 Epidemic(7)                                                                                                             | Cao                                        | 2020 | Chengdu, China        | Upper-middle-income        | Hospital                          | Not specified | 3               | Implemented                                |
| Hospital surge capacity in a tertiary emergency referral centre during the COVID-19 outbreak in Italy(8)                                                                       | Carenzo                                    | 2020 | Milan, Italy          | High-income                | Hospital                          | Not specified | 4               | Implemented                                |
| Standard Operating Procedure for Triage of suspected COVID-19 patients in non-US Healthcare settings(9)                                                                        | Centers for Disease Control and Prevention | 2020 | United States         | High-income                | Not specified                     | Not specified | 4               | Proposed                                   |

|                                                                                                                                                                                           |           |      |                             |                     |                                   |               |    |             |
|-------------------------------------------------------------------------------------------------------------------------------------------------------------------------------------------|-----------|------|-----------------------------|---------------------|-----------------------------------|---------------|----|-------------|
| Enhancing the triage and cohort of patients in public primary care clinics in response to the coronavirus disease 2019 (COVID-19) in Hong Kong: an experience from a hospital cluster(10) | Chan      | 2020 | Hong Kong, China            | Upper-middle-income | Outpatient / general practitioner | Not specified | 3  | Implemented |
| Infection control measures of a Taiwanese hospital to confront the COVID-19 pandemic(11)                                                                                                  | Chang     | 2020 | Kaohsiun, Taiwan            | High-income         | Hospital                          | Not specified | 3  | Implemented |
| Fangcang shelter hospitals: a novel concept for responding to public health emergencies(12)                                                                                               | Chen      | 2020 | Wuhan, China                | Upper-middle-income | Hospital                          | Not specified |    | Implemented |
| Escalating infection control response to the rapidly evolving epidemiology of the coronavirus disease 2019 (COVID-19) due to SARS-CoV-2 in Hong Kong(13)                                  | Cheng     | 2020 | Hong Kong, China            | Upper-middle-income | Not specified                     | Not specified | 4  | Implemented |
| Onsite telemedicine strategy for coronavirus (COVID-19) screening to limit exposure in ED(14)                                                                                             | Chou      | 2020 | Texas, United States        | High-income         | Hospital-based emergency care     | Not specified | 3  | Implemented |
| Mobilization and Preparation of a Large Urban Academic Center During the COVID-19 Pandemic(15)                                                                                            | Chowdhury | 2020 | Pennsylvania, United States | High-income         | Hospital                          | Not specified | 13 | Implemented |
| Revised Triage and Surveillance Protocols for Temporary Emergency Department Closures in Tertiary Hospitals as a Response to COVID-19 Crisis in Daegu Metropolitan City(16)               | Chung     | 2020 | Daegu, Korea                | High-income         | Hospital-based emergency care     | Not specified | 7  | Proposed    |
| Infection control practices in children during COVID-19 pandemic: differences from adults(17)                                                                                             | Devrim    | 2020 | Izmir, Turkey               | Upper-middle-income | Not specified                     | Paediatric    | 4  | Implemented |
| Calculated Decisions: Brescia-COVID Respiratory Severity Scale (BCRSS)/Algorithm(18)                                                                                                      | Duca      | 2020 | United States               | High-income         | Hospital-based emergency care     | Not specified | 1  | Implemented |
| Triage decision-making at the time of COVID-19 infection: the Piacenza strategy(19)                                                                                                       | Erika     | 2020 | Piacenza, Italy             | High-income         | Hospital-based emergency care     | Not specified | 4  | Implemented |
| Lung Ultrasound vs. Chest X-Ray Study for the Radiographic Diagnosis of COVID-19 Pneumonia in a High-Prevalence Population.(20)                                                           | Gibbons   | 2021 | United States               | High-income         | Not specified                     | Not specified | 7  | Proposed    |
| Immersion in an emergency department triage center during the Covid-19 outbreak: first report of the Liège University hospital experience(21)                                             | Gilbert   | 2020 | Liège, Belgium              | High-income         | Hospital-based emergency care     | Not specified | 5  | Implemented |

|                                                                                                                                                                                                                                                                                |        |      |                 |                     |                                   |               |   |             |
|--------------------------------------------------------------------------------------------------------------------------------------------------------------------------------------------------------------------------------------------------------------------------------|--------|------|-----------------|---------------------|-----------------------------------|---------------|---|-------------|
| An effective screening and management process in the outpatient clinic for patients requiring hospitalization during the COVID-19 pandemic(22)                                                                                                                                 | Guo    | 2020 | Beijing, China  | Upper-middle-income | Outpatient / general practitioner | Not specified | 4 | Proposed    |
| How to transform a general hospital into an "infectious disease hospital" during the epidemic of COVID-19(23)                                                                                                                                                                  | He     | 2020 | China           | Upper-middle-income | Hospital                          | Not specified | 2 | Implemented |
| Screening and triage at health-care facilities in Timor-Leste during the COVID-19 pandemic(24)                                                                                                                                                                                 | Howitt | 2020 | Timor-Leste     | Lower-middle income | Not specified                     | Not specified | 2 | Implemented |
| Application and effects of fever screening system in the prevention of nosocomial infection in the only designated hospital of coronavirus disease 2019 (COVID-19) in Shenzhen, China(25)                                                                                      | Huang  | 2020 | Shenzhen, China | Upper-middle-income | Hospital                          | Not specified | 5 | Implemented |
| The role of emergency medical services in containing COVID-19(26)                                                                                                                                                                                                              | Jaffe  | 2020 | Israel          | High-income         | Prehospital emergency care        | Not specified | 2 | Implemented |
| An algorithmic approach to diagnosis and treatment of coronavirus disease 2019 (COVID-19) in children: Iranian expert's consensus statement(27)                                                                                                                                | Karimi | 2020 | Tehran, Iran    | Upper-middle-income | Not specified                     | Paediatric    | 9 | Proposed    |
| 2019-nCoV: The Identify-Isolate-Inform (3I) Tool Applied to a Novel Emerging Coronavirus(28)                                                                                                                                                                                   | Koenig | 2020 | United states   | High-income         | Not specified                     | Not specified | 3 | Proposed    |
| Diagnosis and clinical management of severe acute respiratory syndrome Coronavirus 2 (SARS-CoV-2) infection: an operational recommendation of Peking Union Medical College Hospital (V2.0): Working Group of 2019 Novel Coronavirus, Peking Union Medical College Hospital(29) | Li     | 2020 | Beijing, China  | Upper-middle-income | Not specified                     | Not specified | 1 | Proposed    |
| A Double Triage and Telemedicine Protocol to Optimize Infection Control in an Emergency Department in Taiwan During the COVID-19 Pandemic: Retrospective Feasibility Study(30)                                                                                                 | Lin    | 2020 | Taipei, Taiwan  | High-income         | Hospital                          | Adult         | 3 | Implemented |
| Optimizing screening strategies for coronavirus disease 2019: A study from Middle China(31)                                                                                                                                                                                    | Liu    | 2020 | Changsa, China  | Upper-middle-income | Not specified                     | Not specified | 3 | Proposed    |

|                                                                                                                                                         |                |      |                         |                     |                                   |               |    |             |
|---------------------------------------------------------------------------------------------------------------------------------------------------------|----------------|------|-------------------------|---------------------|-----------------------------------|---------------|----|-------------|
| A COVID-19 Risk Assessment Decision Support System for General Practitioners: Design and Development Study(32)                                          | Liu            | 2020 | Hangzhou, China         | Upper-middle-income | Outpatient / general practitioner | Not specified | 36 | Proposed    |
| Reorganization of a large academic hospital to face COVID-19 outbreak: The model of Parma, Emilia-Romagna region, Italy(30)                             | Meschi         | 2020 | Parma, Italy            | High-income         | Hospital-based emergency care     | Not specified | 3  | Implemented |
| How emergency departments prepare for virus disease outbreaks like COVID-19(31)                                                                         | Möckel         | 2020 | Germany                 | High-income         | Hospital-based emergency care     | Not specified | 3  | Implemented |
| Clinical Triage in Cough Clinic Alleviates COVID-19 Overload in Emergency Department in India.(32)                                                      | Nayan          | 2020 | West Bengal, India      | Lower-middle-income | Hospital                          | Not specified | 8  | Implemented |
| A Pediatric Emergency Department Protocol to Avoid Interhospital Spread of SARS-CoV-2 during the Outbreak in Bergamo, Italy(33)                         | Nicastro       | 2020 | Bergamo, Italy          | High-income         | Hospital                          | Paediatric    | 3  | Implemented |
| The ultrasound guided triage: a new tool for prehospital management of COVID-19 pandemic(34)                                                            | Piliego        | 2020 | Italy                   | High-income         | Not specified                     | Not specified | 7  | Proposed    |
| Screening and managing of suspected or confirmed novel coronavirus (COVID-19) patients: experiences from a tertiary hospital outside Hubei province(35) | Pu             | 2020 | Chengdu, China          | Upper-middle-income | Hospital                          | Not specified | 2  | Implemented |
| Reorganising the emergency department to manage the COVID-19 outbreak(36)                                                                               | Quah           | 2020 | Singapore               | High-income         | Hospital-based emergency care     | Not specified | 7  | Implemented |
| Diagnostic accuracy of symptoms as a diagnostic tool for SARS-CoV 2 infection: a cross-sectional study in a cohort of 2,173 patients.(37)               | Romero-Gameros | 2021 | Mexico City, Mexico     | Upper-middle-income | Hospital-based emergency care     | Not specified | 11 | Proposed    |
| Can You Catch It? Lessons Learned and Modification of ED Triage Symptom- and Travel-Screening Strategy(38)                                              | Schwedhelm     | 2020 | Nebraska, United States | High-income         | Hospital-based emergency care     | Not specified | 4  | Implemented |
| Emergency Responses to Covid-19 Outbreak: Experiences and Lessons from a General Hospital in Nanjing, China(39)                                         | Shen           | 2020 | Nanjing, China          | Upper-middle-income | Hospital                          | Not specified | 5  | Implemented |
| A quickly, effectively screening process of novel corona virus disease 2019 (COVID-19) in children in Shanghai, China(40)                               | Shi            | 2020 | Shanghai, China         | Upper-middle-income | Hospital                          | Paediatric    | 3  | Implemented |
| The response of Milan's Emergency Medical System to the COVID-19 outbreak in Italy(41)                                                                  | Spina          | 2020 | Milan, Italy            | High-income         | Prehospital emergency care        | Not specified | 2  | Implemented |
| Reducing hospital admissions for COVID-19 at a dedicated screening centre in Singapore(42)                                                              | Tan            | 2020 | Singapore               | High-income         | Hospital                          | Not specified | 3  | Implemented |

|                                                                                                                                                        |                           |      |                             |                     |                                   |               |    |             |
|--------------------------------------------------------------------------------------------------------------------------------------------------------|---------------------------|------|-----------------------------|---------------------|-----------------------------------|---------------|----|-------------|
| The role of triage in the prevention and control of COVID-19(43)                                                                                       | Wang                      | 2020 | Xi'an, China                | Upper-middle-income | Hospital                          | Not specified | 7  | Implemented |
| Providing uninterrupted care during COVID-19 pandemic: experience from Beijing Tiantan Hospital(44)                                                    | Wang                      | 2020 | Beijing, China              | Upper-middle-income | Hospital                          | Not specified | 4  | Implemented |
| Containing COVID-19 in the Emergency Department: The Role of Improved Case Detection and Segregation of Suspect Cases(45)                              | Wee                       | 2020 | Singapore                   | High-income         | Hospital-based emergency care     | All ages      | 2  | Implemented |
| Redesigning emergency department operations amidst a viral pandemic(46)                                                                                | Whiteside                 | 2020 | United States               | High-income         | Hospital-based emergency care     | Not specified | 3  | Proposed    |
| Clinical Management of COVID-19 Interim Guidance(47)                                                                                                   | World Health Organization | 2020 | Not applicable              | Not applicable      | Not specified                     | All ages      | 4  | Proposed    |
| Strategies for qualified triage stations and fever clinics during the outbreak of COVID-2019 in the county hospitals of Western Chongqing(48)          | Wu                        | 2020 | Western Chongqing, China    | Upper-middle-income | Outpatient / general practitioner | Not specified | 17 | Implemented |
| Therapeutic and triage strategies for 2019 novel coronavirus disease in fever clinics(49)                                                              | Zhang                     | 2020 | Wuhan, China                | Upper-middle-income | Outpatient / general practitioner | Not specified | 10 | Implemented |
| Analysis and suggestions for the preview and triage screening of children with suspected COVID-19 outside the epidemic area of Hubei Province(50)      | Zhang                     | 2020 | Chongqing, China            | Upper-middle-income | Outpatient / general practitioner | Paediatric    | 5  | Implemented |
| COVID19: A Systematic Approach to Early Identification and Healthcare Worker Protection(51)                                                            | Zhao                      | 2020 | Shanghai, China             | Upper-middle-income | Not specified                     | Not specified | 4  | Proposed    |
| Primary stratification and identification of suspected Corona virus disease 2019 (COVID-19) from clinical perspective by a simple scoring proposal(52) | Zhou                      | 2020 | Gansu, China                | Upper-middle-income | Not specified                     | Not specified | 10 | Proposed    |
| Proposed Clinical Indicators for Efficient Screening and Testing for COVID-19 Infection from Classification and Regression Trees (CART) Analysis(53)   | Zimmerman                 | 2020 | Pennsylvania, United States | High-income         | Outpatient / general practitioner | Not specified | 5  | Proposed    |
| Application of Critical Care Ultrasound in Patients With COVID-19: Our Experience and Perspective.(54)                                                 | Zou                       | 2020 | Chengdu, China              | Upper-middle-income | Not specified                     | Not specified | 7  | Proposed    |

**Supplementary Table 2: Triage tool study characteristics (n=23).**

| Title                                                                                                                                                                       | First author                             | Year | Study location              | Study setting income level | Study setting                 | Age group     | No. tool inputs | Has the tool been proposed or implemented? |
|-----------------------------------------------------------------------------------------------------------------------------------------------------------------------------|------------------------------------------|------|-----------------------------|----------------------------|-------------------------------|---------------|-----------------|--------------------------------------------|
| Point-of-Care Ultrasound in the Evaluation of COVID-19.(55)                                                                                                                 | Abrams                                   | 2020 | United States               | High-income                | Hospital                      | Not specified | 1               | Proposed                                   |
| Emergency Department COVID-19 Severity Classification(56)                                                                                                                   | American College of Emergency Physicians | 2020 | United States               | High-income                | Not specified                 | Adults        | 41              | Proposed                                   |
| Fangcang shelter hospitals: a novel concept for responding to public health emergencies(12)                                                                                 | Chen                                     | 2020 | Wuhan, China                | Upper-middle-income        | Hospital                      | Not specified | 12              | Implemented                                |
| Mobilization and Preparation of a Large Urban Academic Center During the COVID-19 Pandemic(15)                                                                              | Chowdhury                                | 2020 | Pennsylvania, United States | High-income                | Hospital                      | Not specified | 16              | Implemented                                |
| Revised Triage and Surveillance Protocols for Temporary Emergency Department Closures in Tertiary Hospitals as a Response to COVID-19 Crisis in Daegu Metropolitan City(16) | Chung                                    | 2020 | Daegu, Korea                | High-income                | Hospital-based emergency care | Not specified | 8               | Proposed                                   |
| Early prediction of the risk of severe coronavirus disease 2019: A key step in therapeutic decision making(57)                                                              | Côté                                     | 2020 | Quebec, Canada              | High-income                | Not specified                 | Not specified | 21              | Proposed                                   |
| Infection control practices in children during COVID-19 pandemic: differences from adults(17)                                                                               | Devrim                                   | 2020 | Izmir, Turkey               | Upper-middle-income        | Not specified                 | Paediatric    | 5               | Implemented                                |
| Using Lung Point-of-care Ultrasound in Suspected COVID-19: Case Series and Proposed Triage Algorithm.(58)                                                                   | Duggan                                   | 2020 | United States               | High-income                | Not specified                 | Not specified | 1               | Proposed                                   |
| Simple, fast and affordable triaging pathway for COVID-19.(59)                                                                                                              | Eggleton                                 | 2020 | United Kingdom              | High-income                | Not specified                 | Not specified | 1               | Proposed                                   |
| How is COVID-19 affecting South Korea? What is our current strategy?(60)                                                                                                    | Her                                      | 2020 | South Korea                 | High-income                | Not specified                 | Not specified | 2               | Implemented                                |
| Screening and triage at health-care facilities in Timor-Leste during the COVID-19 pandemic(24)                                                                              | Howitt                                   | 2020 | Timor-Leste                 | Lower-middle income        | Not specified                 | Not specified | 4               | Implemented                                |

|                                                                                                                                                                                                                                                                                |                  |      |                              |                     |                                   |               |    |             |
|--------------------------------------------------------------------------------------------------------------------------------------------------------------------------------------------------------------------------------------------------------------------------------|------------------|------|------------------------------|---------------------|-----------------------------------|---------------|----|-------------|
| An algorithmic approach to diagnosis and treatment of coronavirus disease 2019 (COVID-19) in children: Iranian expert's consensus statement(27)                                                                                                                                | Karimi           | 2020 | Tehran, Iran                 | Upper-middle-income | Not specified                     | Paediatric    | 15 | Proposed    |
| Diagnosis and clinical management of severe acute respiratory syndrome Coronavirus 2 (SARS-CoV-2) infection: an operational recommendation of Peking Union Medical College Hospital (V2.0): Working Group of 2019 Novel Coronavirus, Peking Union Medical College Hospital(29) | Li               | 2020 | Beijing, China               | Upper-middle-income | Hospital                          | Not specified | 11 | Proposed    |
| A Double Triage and Telemedicine Protocol to Optimize Infection Control in an Emergency Department in Taiwan During the COVID-19 Pandemic: Retrospective Feasibility Study(30)                                                                                                 | Lin              | 2020 | Taipei, Taiwan               | High-income         | Hospital                          | Adult         | 8  | Implemented |
| CLUE: COVID-19 lung ultrasound in emergency department(61)                                                                                                                                                                                                                     | Manivel          | 2020 | Sydney, Australia            | High-income         | Hospital-based emergency care     | Not specified | 1  | Proposed    |
| Proposed Modifications in the 6-minute Walk Test for Potential Application in Patients with mild Coronavirus Disease 2019 (COVID-19): A Step to Optimize Triage Guidelines(62)                                                                                                 | Mantha           | 2020 | India                        | Lower-middle income | Not specified                     | Not specified | 6  | Proposed    |
| Reorganization of a large academic hospital to face COVID-19 outbreak: The model of Parma, Emilia-Romagna region, Italy(30)                                                                                                                                                    | Meschi           | 2020 | Parma, Italy                 | High-income         | Hospital-based emergency care     | Not specified | 8  | Implemented |
| A Dynamic Bayesian Model for Identifying High-Mortality Risk in Hospitalized COVID-19 Patients.(63)                                                                                                                                                                            | Momeni-Boroujeni | 2021 | New York, United States      | High-income         | Hospital                          | Not specified | 11 | Proposed    |
| The ultrasound guided triage: a new tool for prehospital management of COVID-19 pandemic(34)                                                                                                                                                                                   | Piliego          | 2020 | Italy                        | High-income         | Not specified                     | Not specified | 9  | Proposed    |
| Pattern recognition of high-resolution computer tomography (HRCT) chest to guide clinical management in patients with mild to moderate COVID-19.(64)                                                                                                                           | Rajalingam       | 2021 | South Tamilnadu, India       | Lower-middle-income | Outpatient/general practitioner   | Not specified | 1  | Proposed    |
| COVID-19 Outpatient Screening: A Prediction Score for Adverse Events(65)                                                                                                                                                                                                       | Sun              | 2020 | Massachusetts, United States | High-income         | Outpatient / general practitioner | Adult         | 20 | Proposed    |

|                                                                                                         |                           |      |                |                     |               |               |    |             |
|---------------------------------------------------------------------------------------------------------|---------------------------|------|----------------|---------------------|---------------|---------------|----|-------------|
| Lower mortality of COVID-19 by early recognition and intervention: experience from Jiangsu Province(66) | Sun                       | 2020 | Nanjing, China | Upper-middle-income | Not specified | Not specified | 6  | Implemented |
| Clinical Management of COVID-19 Interim Guidance(45)                                                    | World Health Organization | 2020 | Not applicable | Not applicable      | Not specified | All ages      | 18 | Proposed    |



**Supplementary Table 3: Severity scoring / prognostication tool study characteristics (n=54).**

| Title                                                                                                                                                                               | First author | Year | Study location       | Study setting income level | Study setting       | Age group     | No. tool inputs | Has the tool been proposed or implemented? |
|-------------------------------------------------------------------------------------------------------------------------------------------------------------------------------------|--------------|------|----------------------|----------------------------|---------------------|---------------|-----------------|--------------------------------------------|
| Isaric 4c Mortality Score As A Predictor Of In-Hospital Mortality In Covid-19 Patients Admitted In Ayub Teaching Hospital During First Wave Of The Pandemic.(67)                    | Ali          | 2021 | Abbottabad, Pakistan | Lower-middle-income        | Hospital            | Not specified | 8               | Proposed                                   |
| Development and validation of a prediction model for severe respiratory failure in hospitalized patients with SARS-Cov-2 infection: a multicenter cohort study (PREDICO study) (68) | Bartoletti   | 2020 | Bologna, Italy       | High-income                | Hospital            | Not specified | 8               | Proposed                                   |
| Lung ultrasonography for risk stratification in patients with COVID-19: a prospective observational cohort study(69)                                                                | Brahier      | 2020 | Switzerland          | High-income                | Hospital            | Not specified | 1               | Proposed                                   |
| Prediction of severe illness due to COVID-19 based on an analysis of initial fibrinogen to albumin ratio and platelet count(70)                                                     | Bi           | 2020 | Taizhou, China       | Upper-middle-income        | Hospital            | Not specified | 2               | Proposed                                   |
| Chest X-ray in new Coronavirus Disease 2019 (COVID-19) infection: findings and correlation with clinical outcome(71)                                                                | Cozzi        | 2020 | Florence, Italy      | High-income                | Hospital            | Not specified | 1               | Proposed                                   |
| Predicting CoVID-19 community mortality risk using machine learning and development of an online prognostic tool.(72)                                                               | Das          | 2020 | South Korea          | High-income                | Not specified       | Not specified | 3               | Proposed                                   |
| A novel simple scoring model for predicting severity of patients with SARS-CoV-2 infection(73)                                                                                      | Dong         | 2020 | Wuhan, China         | Upper-middle-income        | Hospital            | Not specified | 3               | Proposed                                   |
| Correlation between the variables collected at admission and progression to severe cases during hospitalization among patients with COVID-19 in Chongqing(74)                       | Duan         | 2020 | Chongqing, China     | Upper-middle-income        | Not specified       | Not specified | 3               | Proposed                                   |
| A multipurpose machine learning approach to predict COVID-19 negative prognosis in São Paulo, Brazil(75)                                                                            | Fernandes    | 2021 | São Paulo, Brazil    | High-income                | Upper-middle-income | Not specified | 5               | Proposed                                   |

|                                                                                                                                                          |               |      |                            |                     |                               |               |    |          |
|----------------------------------------------------------------------------------------------------------------------------------------------------------|---------------|------|----------------------------|---------------------|-------------------------------|---------------|----|----------|
| The utility of established prognostic scores in COVID-19 hospital admissions: a multicentre prospective evaluation of CURB-65, NEWS2, and qSOFA(76)      | Frost         | 2020 | Liverpool, England         | High-income         | Hospital                      | Not specified | 2  | Proposed |
| A clinical risk score to identify patients with COVID-19 at high risk of critical care admission or death: An observational cohort study(77)             | Galloway      | 2020 | London, United Kingdom     | High-income         | Hospital                      | Not specified | 10 | Proposed |
| Prognostic Accuracy of the SIRS, qSOFA, and NEWS for Early Detection of Clinical Deterioration in SARS-CoV-2 Infected Patients(78)                       | Geol Jang     | 2020 | Daegu, Korea               | High-income         | Not specified                 | Not specified | 3  | Proposed |
| Predictive value of National Early Warning Score 2 (NEWS2) for intensive care unit admission in patients with SARS-CoV-2 infection(79)                   | Gidari        | 2020 | Perugia, Italy             | High-income         | Hospital                      | Not specified | 1  | Proposed |
| A Tool for Early Prediction of Severe Coronavirus Disease 2019 (COVID-19): A Multicenter Study Using the Risk Nomogram in Wuhan and Guangdong, China(80) | Gong          | 2020 | Guangzhou, China           | Upper-middle-income | Hospital                      | Not specified | 7  | Proposed |
| Development and validation of a prognostic model based on comorbidities to predict COVID-19 severity: a population-based study(81)                       | Gude-Sampedro | 2021 | Galicia, Spain             | High-income         | Not specified                 | Not specified | 10 | Proposed |
| Evaluation of the clinical profile, laboratory parameters and outcome of two hundred COVID-19 patients from a tertiary centre in India(82)               | Gupta         | 2020 | India                      | Lower-middle-income | Not specified                 | Not specified | 12 | Proposed |
| Development and validation of the quick COVID-19 severity index (qCSI): a prognostic tool for early clinical decompensation(83)                          | Haimovich     | 2020 | Connecticut, United States | High-income         | Not specified                 | Not specified | 3  | Proposed |
| Predictive Value of 5 Early Warning Scores for Critical COVID-19 Patients(84)                                                                            | Hu            | 2020 | Wuhan, China               | Upper-middle-income | Hospital-based emergency care | Not specified | 5  | Proposed |
| COVID-19 Severity Index: predictive score for hospitalized patients(85)                                                                                  | Huespe        | 2020 | Buenos Aires, Argentina    | Upper-middle-income | Hospital                      | Not specified | 16 | Proposed |

|                                                                                                                                                                                                         |             |      |                           |                     |               |                               |    |          |
|---------------------------------------------------------------------------------------------------------------------------------------------------------------------------------------------------------|-------------|------|---------------------------|---------------------|---------------|-------------------------------|----|----------|
| COVID-19: Symptoms, course of illness and use of clinical scoring systems for the first 42 patients admitted to a Norwegian local hospital(86)                                                          | Ihle-Hansen | 2020 | Viken county, Norway      | High-income         | Hospital      | Not specified                 | 1  | Proposed |
| Clinical Characteristics and Prognostic Factors for Intensive Care Unit Admission of Patients With COVID-19: Retrospective Study Using Machine Learning and Natural Language Processing(87)             | Izquierdo   | 2020 | Castilla-La Mancha, Spain | High-income         | Not specified | Not specified                 | 3  | Proposed |
| Development and validation of a model for individualized prediction of hospitalization risk in 4,536 patients with COVID-19(88)                                                                         | Jehi        | 2020 | Guangzhou, China          | Upper-middle-income | Not specified | Not specified                 | 8  | Proposed |
| The association of chest radiographic findings and severity scoring with clinical outcomes in patients with COVID-19 presenting to the emergency department of a tertiary care hospital in Pakistan(89) | Kaleemi     | 2021 | Pakistan                  | Lower-middle-income | Adult         | Hospital-based emergency care | 1  | Proposed |
| The performance of the National Early Warning Score and National Early Warning Score 2 in hospitalised patients infected by the severe acute respiratory syndrome coronavirus 2 (SARS-CoV-2).(90)       | Kostakis    | 2020 | United Kingdom            | High-income         | Hospital      | Not specified                 | 1  | Proposed |
| Clinical Frailty Scale for risk stratification in patients with SARS-CoV-2 infection(91)                                                                                                                | Labenz      | 2020 | Mainz, Germany            | High-income         | Hospital      | Not specified                 | 1  | Proposed |
| Triage tool for suspected COVID-19 patients in the emergency room: AIFELL score(92)                                                                                                                     | Levenfus    | 2020 | Zurich, Switzerland       | High-income         | Hospital      | Not specified                 | 6  | Proposed |
| A simple algorithm helps early identification of SARS-CoV-2 infection patients with severe progression tendency(93)                                                                                     | Li          | 2020 | Shanghai, China           | Upper-middle-income | Not specified | Not specified                 | 3  | Proposed |
| Development and Validation of a Clinical Risk Score to Predict the Occurrence of Critical Illness in Hospitalized Patients With COVID-19(94)                                                            | Liang       | 2020 | Guangzhou, China          | Upper-middle-income | Not specified | Not specified                 | 10 | Proposed |
| Early triage of critically ill COVID-19 patients using deep learning(95)                                                                                                                                | Liang       | 2020 | Guangzhou, China          | Upper-middle-income | Not specified | Not specified                 | 10 | Proposed |

|                                                                                                                                                                                                 |             |      |                             |                     |               |               |    |          |
|-------------------------------------------------------------------------------------------------------------------------------------------------------------------------------------------------|-------------|------|-----------------------------|---------------------|---------------|---------------|----|----------|
| Development and validation of a risk stratification model for screening suspected cases of COVID-19 in China(96)                                                                                | Ma          | 2020 | Wuhan, China                | Upper-middle-income | Not specified | Not specified | 23 | Proposed |
| National Early Warning Score 2 (NEWS2) on admission predicts severe disease and in-hospital mortality from Covid-19 - a prospective cohort study(97)                                            | Myrstad     | 2020 | Oslo, Norway                | High-income         | Hospital      | Not specified | 1  | Proposed |
| A score combining early detection of cytokines accurately predicts COVID-19 severity and intensive care unit transfer(98)                                                                       | Nagant      | 2020 | Brussels, Belgium           | High-income         | Hospital      | Not specified | 3  | Proposed |
| A nomogram to predict the risk of unfavourable outcome in COVID-19: a retrospective cohort of 279 hospitalized patients in Paris area(99)                                                       | Nguyen      | 2020 | Paris, France               | High-income         | Hospital      | Not specified | 7  | Proposed |
| Automated EHR score to predict COVID-19 outcomes at US Department of Veterans Affairs(100)                                                                                                      | Osborne     | 2020 | California, United States   | High-income         | Not specified | Adult         | 25 | Proposed |
| NEWS can predict deterioration of patients with COVID-19(101)                                                                                                                                   | Peng        | 2020 | Huazhong, China             | Upper-middle-income | Not specified | Not specified | 2  | Proposed |
| Examining the utility of extended laboratory panel testing in the emergency department for risk stratification of patients with COVID-19: a single-centre retrospective service evaluation(102) | Ponsford    | 2021 | Cardiff, United Kingdom     | High-income         | Hospital      | Adult         | 8  | Proposed |
| Association between Clinical Frailty Scale score and hospital mortality in adult patients with COVID-19 (COMET): an international, multicentre, retrospective, observational cohort study(103)  | Sablerolles | 2021 | Europe                      | High-income         | Hospital      | Adult         | 1  | Proposed |
| Performance of pneumonia severity index and CURB-65 in predicting 30-day mortality in patients with COVID-19(104)                                                                               | Satici      | 2020 | Istanbul, Turkey            | Upper-middle-income | Hospital      | Not specified | 2  | Proposed |
| Model-based Prediction of Critical Illness in Hospitalized Patients with COVID-19(105)                                                                                                          | Schalekamp  | 2020 | Amersfoort, The Netherlands | High-income         | Not specified | Not specified | 7  | Proposed |

|                                                                                                                                                                                       |                    |      |                                |                     |               |               |    |          |
|---------------------------------------------------------------------------------------------------------------------------------------------------------------------------------------|--------------------|------|--------------------------------|---------------------|---------------|---------------|----|----------|
| Scoring systems for predicting mortality for severe patients with COVID-19(106)                                                                                                       | Shang              | 2020 | Wuhan, China                   | Upper-middle-income | Hospital      | Not specified | 5  | Proposed |
| Evaluating a Widely Implemented Proprietary Deterioration Index Model Among Hospitalized COVID-19 Patients(107)                                                                       | Singh              | 2020 | Michigan, United States        | High-income         | Not specified | Not specified | 1  | Proposed |
| Development and validation of a simple risk score for diagnosing COVID-19 in the emergency room(108)                                                                                  | Sung               | 2020 | Maryland, United States        | High-income         | Hospital      | Not specified | 10 | Proposed |
| Prediction of Sepsis in COVID-19 Using Laboratory Indicators(109)                                                                                                                     | Tang               | 2021 | Tongji, China                  | Upper-middle-income | Not specified | Not specified | 7  | Proposed |
| Development of a data-driven COVID-19 prognostication tool to inform triage and step-down care for hospitalised patients in Hong Kong: A population based cohort study(110)           | Tsui               | 2020 | Hong Kong, China               | Upper-middle-income | Hospital      | Not specified | 7  | Proposed |
| Personalized predictive models for symptomatic COVID-19 patients using basic preconditions: Hospitalizations, mortality, and the need for an ICU or ventilator(111)                   | Wollenstein-Betech | 2020 | Mexico                         | Upper-middle-income | Not specified | Not specified | 9  | Proposed |
| Development of a Clinical Decision Support System for Severity Risk Prediction and Triage of COVID-19 Patients at Hospital Admission: An International Multicenter Study(112)         | Wu                 | 2020 | Maastricht, the Netherlands    | High-income         | Hospital      | Not specified | 7  | Proposed |
| Development and validation of the HNC-LL score for predicting the severity of coronavirus disease 2019(113)                                                                           | Xiao               | 2020 | Guangzhou, China               | Upper-middle-income | Not specified | Not specified | 5  | Proposed |
| Point-of-Care Lung Ultrasound for COVID-19: Findings and Prognostic Implications From 105 Consecutive Patients(114)                                                                   | Yasukawa           | 2021 | Washington D.C., United States | High-income         | Hospital      | Not specified | 1  | Proposed |
| A Novel Scoring System for Prediction of Disease Severity in COVID-19(115)                                                                                                            | Zhang              | 2020 | Beijing, China                 | Upper-middle-income | Hospital      | Not specified | 5  | Proposed |
| Development and validation of a risk factor-based system to predict short-term survival in adult hospitalized patients with COVID-19: a multicenter, retrospective, cohort study(116) | Zhang              | 2020 | Honghu, China                  | Upper-middle-income | Hospital      | Not specified | 1  | Proposed |

|                                                                                                                                           |      |      |                         |                     |               |               |   |          |
|-------------------------------------------------------------------------------------------------------------------------------------------|------|------|-------------------------|---------------------|---------------|---------------|---|----------|
| Lung Ultrasound Score in Evaluating the Severity of Coronavirus Disease 2019 (COVID-19) Pneumonia(117)                                    | Zhao | 2020 | Shanghai, China         | Upper-middle-income | Hospital      | Not specified | 1 | Proposed |
| Development and validation a nomogram for predicting the risk of severe COVID-19: A multi-center study in Sichuan, China(118)             | Zhou | 2020 | Sichuan, China          | Upper-middle-income | Not specified | Not specified | 6 | Proposed |
| Deep-learning artificial intelligence analysis of clinical variables predicts mortality in COVID-19 patients(119)                         | Zhu  | 2020 | New York, United States | High-income         | Not specified | Not specified | 5 | Proposed |
| Acute Physiology and Chronic Health Evaluation II Score as a Predictor of Hospital Mortality in Patients of Coronavirus Disease 2019(120) | Zou  | 2020 | Wuhan, China            | Upper-middle-income | Hospital      | Not specified | 1 | Proposed |

Supplementary Table 4: Summary of validation data for tools being used to screen, triage, and prognosticate COVID-19 patients.

| Title                                                                                                                                                                                    | Validation endpoint                                                                      | Tool training/development validation data        |                              |                              |      |     | Validation type | Other validation data                                         |             |             |      |      |
|------------------------------------------------------------------------------------------------------------------------------------------------------------------------------------------|------------------------------------------------------------------------------------------|--------------------------------------------------|------------------------------|------------------------------|------|-----|-----------------|---------------------------------------------------------------|-------------|-------------|------|------|
|                                                                                                                                                                                          |                                                                                          | AUC                                              | Sensitivity                  | Specificity                  | PPV  | NPV |                 | AUC                                                           | Sensitivity | Specificity | PPV  | NPV  |
| A Novel Scoring System for Prediction of Disease Severity in COVID-19(94)                                                                                                                | ICU admission                                                                            |                                                  |                              |                              |      |     | Retro-spective  | 0.91                                                          | 0.71        | 0.89        |      |      |
| A novel simple scoring model for predicting severity of patients with SARS-CoV-2 infection(62)                                                                                           | COVID-19 confirmed by RT-PCR                                                             |                                                  |                              |                              |      |     | Retro-spective  |                                                               | 0.8         | 0.79        |      |      |
| A quickly, effectively screening process of novel corona virus disease 2019 (COVID-19) in children in Shanghai, China(38)                                                                | COVID-19 diagnosis                                                                       |                                                  | 1                            | 0.71                         | 0.18 | 1   |                 |                                                               |             |             |      |      |
| A simple algorithm helps early identification of SARS-CoV-2 infection patients with severe progression tendency(74)                                                                      | Severe COVID-19 disease                                                                  |                                                  |                              |                              |      |     | Retro-spective  |                                                               | 0.18        | 0.93        | 0.49 | 0.98 |
| A Tool for Early Prediction of Severe Coronavirus Disease 2019 (COVID-19): A Multicenter Study Using the Risk Nomogram in Wuhan and Guangdong, China(67)                                 | Severe COVID-19 disease                                                                  | 0.91                                             | 0.86                         | 0.88                         |      |     |                 |                                                               |             |             |      |      |
| Acute Physiology and Chronic Health Evaluation II Score as a Predictor of Hospital Mortality in Patients of Coronavirus Disease 2019(93)                                                 | In-hospital mortality                                                                    | 0.97                                             | 0.96                         | 0.86                         |      |     |                 |                                                               |             |             |      |      |
| Clinical Characteristics and Prognostic Factors for Intensive Care Unit Admission of Patients With COVID-19: Retrospective Study Using Machine Learning and Natural Language Processing. | ICU admission                                                                            | 0.76                                             |                              |                              |      |     |                 |                                                               |             |             |      |      |
| Containing COVID-19 in the Emergency Department: The Role of Improved Case Detection and Segregation of Suspect Cases(43)                                                                | COVID-19 confirmed by RT-PCR                                                             |                                                  | 0.842 (95% CI [0.736-0.919]) | 0.648 (95% CI [0.625-0.670]) |      |     |                 |                                                               |             |             |      |      |
| COVID-19 Outpatient Screening: A Prediction Score for Adverse Events(57)                                                                                                                 | Hospitalisation, ICU care, need for mechanical ventilation, or death within 7 days of an | 0.80 (hospitalisation); 0.82 (critical illness); |                              |                              |      |     | Pro-spective    | 0.76 (hospitalisation); 0.79 (critical illness); 0.93 (death) |             |             |      |      |

|                                                                                                                                                                                      |                                                  |                                           |                                           |                                           |                                           |                |                                           |                                           |                                           |                                           |      |      |
|--------------------------------------------------------------------------------------------------------------------------------------------------------------------------------------|--------------------------------------------------|-------------------------------------------|-------------------------------------------|-------------------------------------------|-------------------------------------------|----------------|-------------------------------------------|-------------------------------------------|-------------------------------------------|-------------------------------------------|------|------|
|                                                                                                                                                                                      | outpatient medical encounter                     | 0.87 (death)                              |                                           |                                           |                                           |                |                                           |                                           |                                           |                                           |      |      |
| Development and Validation of a Clinical Risk Score to Predict the Occurrence of Critical Illness in Hospitalized Patients With COVID-19(75)                                         | Critical COVID-19 disease                        | 72% (95% CI [65%-79%]) (at risk score >3) | 86% (95% CI [89%-92%]) (at risk score >3) | 74% (95% CI [67%-80%]) (at risk score >3) | 89% (95% CI [85%-91%]) (at risk score >3) | Retro-spective | 80% (95% CI [73%-85%]) (at risk score >3) | 76% (95% CI [70%-81%]) (at risk score >3) | 69% (95% CI [60%-74%]) (at risk score >3) | 85% (95% CI [80%-89%]) (at risk score >3) |      |      |
| Development and validation of a prediction model for severe respiratory failure in hospitalized patients with SARS-Cov-2 infection: a multicenter cohort study (PREDI-CO study)(59)  | Severe respiratory failure                       | 0.89 (95% CI [0.86-0.92])                 |                                           |                                           |                                           |                |                                           |                                           |                                           |                                           |      |      |
| Development and validation of a prognostic model based on comorbidities to predict COVID-19 severity: a population-based study.                                                      | Mortality                                        | 0.89                                      |                                           |                                           |                                           |                |                                           |                                           |                                           |                                           |      |      |
| Development and validation of a risk factor-based system to predict short-term survival in adult hospitalized patients with COVID-19: a multicenter, retrospective, cohort study(89) | 28-day mortality                                 |                                           |                                           |                                           |                                           | Retro-spective | 0.879 (95% CI [0.856-0.900])              |                                           |                                           |                                           |      |      |
| Development and validation of a risk stratification model for screening suspected cases of COVID-19 in China(77)                                                                     | COVID-19 confirmed by RT-PCR                     | 0.86                                      | 0.83                                      | 0.78                                      | 0.32                                      | 0.97           | Retro-spective                            | 0.87                                      | 0.82                                      | 0.77                                      | 0.26 | 0.98 |
| Development and validation of a simple risk score for diagnosing COVID-19 in the emergency room.                                                                                     | COVID-19 confirmed by RT-PCR                     |                                           | 0.796                                     | 0.709                                     |                                           |                |                                           |                                           |                                           |                                           |      |      |
| Development and validation of the HNC-LL score for predicting the severity of coronavirus disease 2019(88)                                                                           | Severe COVID-19 disease                          |                                           |                                           |                                           |                                           |                | Retro-spective                            | 0.86                                      | 0.85                                      | 0.76                                      |      |      |
| Development and validation of the quick COVID-19 severity index (qCSI): a prognostic tool for early clinical decompensation(68)                                                      | Respiratory failure within 24 hours of admission |                                           |                                           |                                           |                                           |                | Retro-spective                            | 0.91                                      | 0.94                                      | 0.82                                      |      |      |
| Development of a Clinical Decision Support System for Severity Risk Prediction and Triage of COVID-19 Patients at Hospital Admission: An International Multicenter Study(87)         | Severe or critical COVID-19 disease              | 0.88                                      | 0.85                                      | 0.74                                      | 0.75                                      | 0.85           |                                           |                                           |                                           |                                           |      |      |
| Development of a data-driven COVID-19 prognostication tool to inform triage and step-down care                                                                                       | Severe COVID-19 disease                          |                                           |                                           | 0.913 (Day-1 model) and                   |                                           |                |                                           |                                           |                                           |                                           |      |      |



|                                                                                                                                                                                             |                                                              |      |                              |                              |  |                |                                  |                                  |                                  |                                  |                                  |
|---------------------------------------------------------------------------------------------------------------------------------------------------------------------------------------------|--------------------------------------------------------------|------|------------------------------|------------------------------|--|----------------|----------------------------------|----------------------------------|----------------------------------|----------------------------------|----------------------------------|
| for hospitalised patients in Hong Kong: A population based cohort study(86)                                                                                                                 |                                                              |      |                              | 0.942<br>(Day-5 model)       |  |                |                                  |                                  |                                  |                                  |                                  |
| Evaluating a Widely Implemented Proprietary Deterioration Index Model Among Hospitalized COVID-19 Patients(85)                                                                              | ICU-level care, mechanical ventilation, or in-hospital death |      |                              |                              |  | Retro-spective | 0.79                             | 0.39                             | 0.91                             | 0.74                             | 0.9                              |
| Examining the utility of extended laboratory panel testing in the emergency department for risk stratification of patients with COVID-19: a single-centre retrospective service evaluation. | 28-day mortality                                             | 0.77 |                              |                              |  |                |                                  |                                  |                                  |                                  |                                  |
| Lower mortality of COVID-19 by early recognition and intervention: experience from Jiangsu Province(58)                                                                                     | Severe COVID-19 disease                                      | 0.96 | 0.955 (95% CI [0.772-0.999]) | 0.899 (95% CI [0.863-0.928]) |  |                |                                  |                                  |                                  |                                  |                                  |
| Lung Ultrasound Score in Evaluating the Severity of Coronavirus Disease 2019 (COVID-19) Pneumonia(90)                                                                                       | Refractory COVID-19 disease                                  |      |                              |                              |  | Retro-spective | 0.52                             | 1                                | 0.74                             |                                  |                                  |
| Model-based Prediction of Critical Illness in Hospitalized Patients with COVID-19(83)                                                                                                       | Critical COVID-19 disease                                    |      |                              |                              |  | Retro-spective | 0.77                             | 0.5                              | 0.88                             | 0.79                             | 0.66                             |
| National Early Warning Score 2 (NEWS2) on admission predicts severe disease and in-hospital mortality from Covid-19 - a prospective cohort study(78)                                        | Severe COVID-19 disease                                      | 0.82 | 0.8                          | 0.84                         |  |                |                                  |                                  |                                  |                                  |                                  |
| NEWS can predict deterioration of patients with COVID-19(81)                                                                                                                                | Severe and critical COVID-19 disease                         |      |                              |                              |  | Pro-spective   | 0.84                             | 1                                | 0.51                             |                                  |                                  |
| Performance of pneumonia severity index and CURB-65 in predicting 30-day mortality in patients with COVID-19(82)                                                                            | 30-day mortality                                             |      |                              |                              |  | Retro-spective | 0.79<br>(CURB-65);<br>0.85 (PSI) | 0.73<br>(CURB-65);<br>0.80 (PSI) | 0.85<br>(CURB-65);<br>0.89 (PSI) | 0.31<br>(CURB-65),<br>0.39 (PSI) | 0.97<br>(CURB-65),<br>0.98 (PSI) |
| Personalized predictive models for symptomatic COVID-19 patients using basic preconditions: Hospitalizations, mortality, and the need for an ICU or ventilator.                             | Mortality                                                    | 0.63 |                              |                              |  |                |                                  |                                  |                                  |                                  |                                  |
| Predicting CoVID-19 community mortality risk using machine learning and development of an online prognostic tool.                                                                           | Mortality                                                    | 0.83 | 0.692                        | 0.968                        |  |                |                                  |                                  |                                  |                                  |                                  |

|                                                                                                                                                      |                              |                              |                              |                              |                               |                |                                                                        |                                                                        |                                                                        |                                                                        |                                                                        |
|------------------------------------------------------------------------------------------------------------------------------------------------------|------------------------------|------------------------------|------------------------------|------------------------------|-------------------------------|----------------|------------------------------------------------------------------------|------------------------------------------------------------------------|------------------------------------------------------------------------|------------------------------------------------------------------------|------------------------------------------------------------------------|
| Prediction of severe illness due to COVID-19 based on an analysis of initial Fibrinogen to Albumin Ratio and Platelet count(60)                      | Severe COVID-19 disease      | 0.863 (95% CI [0.640–0.964]) | 0.593 (95% CI [0.485–0.694]) | 0.339 (95% CI [0.222–0.479]) | 0.9474 (95% CI [0.845–0.986]) | Pro-spective   | 0.857 (95% CI [0.420–0.992])                                           | 0.429 (95% CI [0.226–0.556])                                           | 0.333 (95% CI [0.143–0.588])                                           | 0.9 (95% CI [0.541–0.994])                                             |                                                                        |
| Predictive value of National Early Warning Score 2 (NEWS2) for intensive care unit admission in patients with SARS-CoV-2 infection(66)               | Severe COVID-19 disease      |                              |                              |                              |                               | Retro-spective | 0.89                                                                   | 0.66                                                                   | 0.63                                                                   | 0.9                                                                    |                                                                        |
| Prognostic Accuracy of the SIRS, qSOFA, and NEWS for Early Detection of Clinical Deterioration in SARS-CoV-2 Infected Patients(84)                   | 28-day mortality             |                              |                              |                              |                               | Retro-spective | 0.918 (NEWS); 0.760 (qSOFA); 0.744 (SIRS)                              | 0.867 (NEWS≥ 5)                                                        | 0.905 (NEWS≥ 5)                                                        | 0.591 (NEWS≥ 5)                                                        | 0.977 (NEWS≥ 5)                                                        |
| Proposed Clinical Indicators for Efficient Screening and Testing for COVID-19 Infection from Classification and Regression Trees (CART) Analysis(51) | COVID-19 confirmed by RT-PCR | 0.78                         | 0.96                         | 0.53                         | 0.14                          | 0.99           |                                                                        |                                                                        |                                                                        |                                                                        |                                                                        |
| The utility of established prognostic scores in COVID-19 hospital admissions: a multicentre prospective evaluation of CURB-65, NEWS2, and qSOFA(63)  | 30-day mortality             |                              |                              |                              |                               | Pro-spective   | 0.75 (CURB-65 ≥2); 0.61 (CURB-65 ≥3); 0.78 (NEWS2 ≥5); 0.66 (qSOFA ≥2) | 0.85 (CURB-65 ≥2); 0.61 (CURB-65 ≥3); 0.92 (NEWS2 ≥5); 0.45 (qSOFA ≥2) | 0.47 (CURB-65 ≥2); 0.73 (CURB-65 ≥3); 0.31 (NEWS2 ≥5); 0.484(qSOFA ≥2) | 0.12 (CURB-65 ≥2); 0.17 (CURB-65 ≥3); 0.10 (NEWS2 ≥5); 0.19 (qSOFA ≥2) | 0.97 (CURB-65 ≥2); 0.96 (CURB-65 ≥3); 0.98 (NEWS2 ≥5); 0.94 (qSOFA ≥2) |

Note: Only common, standardised measures of validation were extracted.

AUC = area under curve score; PPV = positive predictive value; NPV = negative predictive value

Supplementary Table 5: Breakdown of inputs used tools used to screen, triage, and prognosticate COVID-19 patients.

| Input                                            | Feasible to evaluate or perform in low-resource setting emergency units? | Screening tools (n=57) |      | Triage tools (n=23)   |       | Severity scoring tools (n=54) |       |
|--------------------------------------------------|--------------------------------------------------------------------------|------------------------|------|-----------------------|-------|-------------------------------|-------|
|                                                  |                                                                          | No. tools using input  | %    | No. tools using input | %     | No. tools using input         | %     |
| <b>CONCURRENT ACUTE CONDITIONS (n=20)</b>        |                                                                          |                        |      |                       |       |                               |       |
| Acute renal failure                              | No                                                                       | 0                      | 0.0% | 0                     | 0.0%  | 2                             | 3.7%  |
| Acute respiratory distress syndrome              | No                                                                       | 0                      | 0.0% | 3                     | 13.0% | 0                             | 0.0%  |
| Animal/insect bites                              | Yes                                                                      | 0                      | 0.0% | 1                     | 4.3%  | 0                             | 0.0%  |
| Bacterial coinfection                            | No                                                                       | 0                      | 0.0% | 2                     | 8.7%  | 0                             | 0.0%  |
| Cardiac arrest                                   | Yes                                                                      | 0                      | 0.0% | 2                     | 8.7%  | 0                             | 0.0%  |
| Current level of physical fitness                | Yes                                                                      | 0                      | 0.0% | 0                     | 0.0%  | 2                             | 3.7%  |
| Encephalopathy                                   | Yes                                                                      | 0                      | 0.0% | 1                     | 4.3%  | 0                             | 0.0%  |
| Major trauma                                     | Yes                                                                      | 0                      | 0.0% | 0                     | 0.0%  | 0                             | 0.0%  |
| Metabolic acidosis                               | No                                                                       | 0                      | 0.0% | 1                     | 4.3%  | 0                             | 0.0%  |
| Multilobe infiltrate                             | Yes                                                                      | 0                      | 0.0% | 0                     | 0.0%  | 0                             | 0.0%  |
| Organ failure                                    | No                                                                       | 0                      | 0.0% | 1                     | 4.3%  | 2                             | 3.7%  |
| Pericarditis                                     | No                                                                       | 0                      | 0.0% | 1                     | 4.3%  | 0                             | 0.0%  |
| Pleural effusion                                 | Yes                                                                      | 0                      | 0.0% | 0                     | 0.0%  | 1                             | 1.9%  |
| Pneumonia                                        | Yes                                                                      | 2                      | 3.5% | 3                     | 13.0% | 2                             | 3.7%  |
| Respiratory distress                             | Yes                                                                      | 1                      | 1.8% | 3                     | 13.0% | 2                             | 3.7%  |
| Pneumothorax                                     | No                                                                       | 0                      | 0.0% | 3                     | 13.0% | 0                             | 0.0%  |
| Respiratory failure                              | Yes                                                                      | 0                      | 0.0% | 3                     | 13.0% | 4                             | 7.4%  |
| Septic shock                                     | Yes                                                                      | 0                      | 0.0% | 3                     | 13.0% | 1                             | 1.9%  |
| Systemic inflammatory response syndrome (SIRS)   | Yes                                                                      | 0                      | 0.0% | 1                     | 4.3%  | 0                             | 0.0%  |
| Unknown clinical inputs (proprietary algorithm)  | No                                                                       | 0                      | 0.0% | 0                     | 0.0%  | 1                             | 1.9%  |
| <b>CLINICAL INTERVENTIONS RECEIVED (n=5)</b>     |                                                                          |                        |      |                       |       |                               |       |
| Nasal intermittent positive pressure ventilation | No                                                                       | 0                      | 0.0% | 1                     | 4.3%  | 0                             | 0.0%  |
| Need for supplemental oxygen                     | Yes                                                                      | 0                      | 0.0% | 1                     | 4.3%  | 7                             | 13.0% |
| High-flow nasal canula                           | No                                                                       | 0                      | 0.0% | 1                     | 4.3%  | 0                             | 0.0%  |
| Mechanical ventilation                           | No                                                                       | 0                      | 0.0% | 1                     | 4.3%  | 0                             | 0.0%  |
| Vasopressors                                     | No                                                                       | 0                      | 0.0% | 1                     | 4.3%  | 0                             | 0.0%  |
| <b>DEMOGRAPHICS (n=7)</b>                        |                                                                          |                        |      |                       |       |                               |       |

|                                                    |     |   |      |   |       |    |       |
|----------------------------------------------------|-----|---|------|---|-------|----|-------|
| Age                                                | Yes | 4 | 7.0% | 9 | 39.1% | 28 | 51.9% |
| Sex                                                | Yes | 2 | 3.5% | 3 | 13.0% | 12 | 22.2% |
| Ethnicity                                          | Yes | 0 | 0.0% | 0 | 0.0%  | 2  | 3.7%  |
| Marital status                                     | Yes | 0 | 0.0% | 0 | 0.0%  | 1  | 1.9%  |
| Pregnancy                                          | Yes | 0 | 0.0% | 0 | 0.0%  | 1  | 1.9%  |
| Race                                               | Yes | 0 | 0.0% | 1 | 4.3%  | 1  | 1.9%  |
| Welsh Index of Multiple Deprivation                | Yes | 0 | 0.0% | 0 | 0.0%  | 1  | 1.9%  |
| <b>COMORBIDITIES (n=29)</b>                        |     |   |      |   |       |    |       |
| Amyotrophic lateral sclerosis                      | Yes | 0 | 0.0% | 1 | 4.3%  | 0  | 0.0%  |
| Any comorbidity                                    | Yes | 2 | 3.5% | 3 | 13.0% | 2  | 3.7%  |
| Asthma                                             | Yes | 0 | 0.0% | 0 | 0.0%  | 1  | 1.9%  |
| Atrial fibrillation                                | Yes | 0 | 0.0% | 0 | 0.0%  | 1  | 1.9%  |
| Body mass index                                    | Yes | 1 | 1.8% | 2 | 8.7%  | 6  | 11.1% |
| Chronic kidney disease                             | Yes | 2 | 3.5% | 1 | 4.3%  | 5  | 9.3%  |
| Chronic obstructive lung disease                   | Yes | 0 | 0.0% | 2 | 8.7%  | 7  | 11.1% |
| Connective tissue disease                          | Yes | 0 | 0.0% | 0 | 0.0%  | 1  | 1.9%  |
| Coronary artery disease / congestive heart failure | Yes | 2 | 3.5% | 1 | 4.3%  | 7  | 13.0% |
| Cystic fibrosis                                    | Yes | 0 | 0.0% | 1 | 4.3%  | 0  | 0.0%  |
| Dementia                                           | Yes | 0 | 0.0% | 0 | 0.0%  | 1  | 1.9%  |
| Depression                                         | Yes | 0 | 0.0% | 0 | 0.0%  | 1  | 1.9%  |
| Diabetes                                           | Yes | 0 | 0.0% | 1 | 4.3%  | 6  | 11.1% |
| Functional disorder                                | Yes | 0 | 0.0% | 0 | 0.0%  | 1  | 1.9%  |
| Hypertension                                       | Yes | 0 | 0.0% | 3 | 13.0% | 6  | 11.1% |
| Immunocompromise                                   | Yes | 3 | 5.3% | 0 | 0.0%  | 4  | 7.4%  |
| Liver disease                                      | Yes | 0 | 0.0% | 0 | 0.0%  | 3  | 5.6%  |
| Malignancy                                         | Yes | 0 | 0.0% | 2 | 8.7%  | 6  | 11.1% |
| Malnutrition                                       | Yes | 0 | 0.0% | 0 | 0.0%  | 1  | 1.9%  |
| Myasthenia gravis                                  | Yes | 0 | 0.0% | 1 | 4.3%  | 0  | 0.0%  |
| Pancreatitis                                       | Yes | 0 | 0.0% | 1 | 4.3%  | 0  | 0.0%  |
| Peripheral vascular disease                        | Yes | 0 | 0.0% | 0 | 0.0%  | 1  | 1.9%  |
| Psychiatric disorder                               | Yes | 1 | 1.8% | 0 | 0.0%  | 1  | 1.9%  |
| Seizure disorder                                   | Yes | 0 | 0.0% | 1 | 4.3%  | 0  | 0.0%  |
| Smoking history                                    | Yes | 0 | 0.0% | 2 | 8.7%  | 1  | 1.9%  |
| Spinal muscular atrophy                            | Yes | 0 | 0.0% | 0 | 0.0%  | 1  | 1.9%  |
| Stroke                                             | Yes | 0 | 0.0% | 1 | 4.3%  | 1  | 1.9%  |
| Transplant history                                 | Yes | 0 | 0.0% | 0 | 0.0%  | 1  | 1.9%  |

|                                         |     |   |      |   |       |    |       |
|-----------------------------------------|-----|---|------|---|-------|----|-------|
| Valvular heart disease                  | Yes | 0 | 0·0% | 0 | 0·0%  | 1  | 1·9%  |
| <b>LABORATORY INVESTIGATIONS (n=64)</b> |     |   |      |   |       |    |       |
| Albumin                                 | No  | 0 | 0·0% | 1 | 4·3%  | 3  | 5·6%  |
| Alanine aminotransferase                | No  | 0 | 0·0% | 2 | 8·7%  | 0  | 0·0%  |
| Albumin/globulin ratio                  | No  | 0 | 0·0% | 0 | 0·0%  | 1  | 1·9%  |
| Alkaline phosphatase                    | No  | 0 | 0·0% | 1 | 4·3%  | 0  | 0·0%  |
| <b>Arterial blood gas</b>               | No  | 0 | 0·0% | 2 | 8·7%  | 1  | 1·9%  |
| Aspartate aminotransferase              | No  | 0 | 0·0% | 1 | 4·3%  | 1  | 1·9%  |
| Basophil count                          | No  | 3 | 5·3% | 1 | 4·3%  | 0  | 0·0%  |
| Blood urea nitrogen                     | No  | 0 | 0·0% | 2 | 8·7%  | 5  | 9·3%  |
| C-reactive protein                      | No  | 2 | 3·5% | 7 | 30·4% | 14 | 25·9% |
| Calcium                                 | No  | 0 | 0·0% | 0 | 0·0%  | 1  | 1·9%  |
| Cardiovascular abnormalities            | No  | 0 | 0·0% | 2 | 8·7%  | 0  | 0·0%  |
| CD3                                     | No  | 0 | 0·0% | 0 | 0·0%  | 1  | 1·9%  |
| CD4                                     | No  | 0 | 0·0% | 0 | 0·0%  | 2  | 3·7%  |
| Chloride                                | No  | 0 | 0·0% | 0 | 0·0%  | 1  | 1·9%  |
| Complete blood count                    | No  | 0 | 0·0% | 1 | 4·3%  | 0  | 0·0%  |
| Creatine kinase                         | No  | 0 | 0·0% | 0 | 0·0%  | 1  | 1·9%  |
| Creatinine                              | No  | 0 | 0·0% | 4 | 17·4% | 5  | 9·3%  |
| D-dimer                                 | No  | 0 | 0·0% | 3 | 13·0% | 5  | 9·3%  |
| Direct bilirubin                        | No  | 0 | 0·0% | 1 | 4·3%  | 4  | 7·4%  |
| Eosinophil count                        | No  | 2 | 3·5% | 2 | 8·7%  | 0  | 0·0%  |
| Erythrocyte sedimentation rate          | No  | 0 | 0·0% | 0 | 0·0%  | 1  | 1·9%  |
| Ferritin                                | No  | 0 | 0·0% | 1 | 4·3%  | 0  | 0·0%  |
| Fibrinogen to albumin ratio             | No  | 0 | 0·0% | 0 | 0·0%  | 1  | 1·9%  |
| Globulin                                | No  | 0 | 0·0% | 0 | 0·0%  | 1  | 1·9%  |
| Glomerular filtration rate              | No  | 0 | 0·0% | 0 | 0·0%  | 1  | 1·9%  |
| Glucose                                 | Yes | 0 | 0·0% | 0 | 0·0%  | 1  | 1·9%  |
| Haematocrit                             | No  | 2 | 3·5% | 0 | 0·0%  | 3  | 5·6%  |
| Haemoglobin                             | No  | 2 | 3·5% | 0 | 0·0%  | 0  | 0·0%  |
| IL-2R                                   | No  | 0 | 0·0% | 0 | 0·0%  | 1  | 1·9%  |
| IL-6                                    | No  | 0 | 0·0% | 0 | 0·0%  | 2  | 3·7%  |
| IL-8                                    | No  | 0 | 0·0% | 0 | 0·0%  | 1  | 1·9%  |
| IL-10                                   | No  | 0 | 0·0% | 0 | 0·0%  | 1  | 1·9%  |
| Immature granulocyte percentage         | No  | 1 | 1·8% | 0 | 0·0%  | 0  | 0·0%  |
| Influenza test                          | No  | 1 | 1·8% | 0 | 0·0%  | 0  | 0·0%  |

|                                            |     |   |       |    |              |    |       |
|--------------------------------------------|-----|---|-------|----|--------------|----|-------|
| INR                                        | No  | 0 | 0.0%  | 1  | 4.3%         | 0  | 0.0%  |
| Lactate                                    | No  | 0 | 0.0%  | 1  | 4.3%         | 0  | 0.0%  |
| Lactate dehydrogenase                      | No  | 0 | 0.0%  | 3  | 13.0%        | 11 | 20.4% |
| Leukocyte count                            | No  | 2 | 3.5%  | 1  | 4.3%         | 1  | 1.9%  |
| Lymphocyte count                           | No  | 6 | 10.5% | 4  | 17.4%        | 1  | 1.9%  |
| Lymphocyte percentage                      | No  | 0 | 0.0%  | 1  | 4.3%         | 1  | 1.9%  |
| Mean corpuscular haemoglobin               | No  | 2 | 3.5%  | 0  | 0.0%         | 0  | 0.0%  |
| Mean corpuscular haemoglobin concentration | No  | 1 | 1.8%  | 0  | 0.0%         | 0  | 0.0%  |
| Mean corpuscular volume                    | No  | 3 | 5.3%  | 0  | 0.0%         | 0  | 0.0%  |
| Mean platelet volume                       | No  | 1 | 1.8%  | 0  | 0.0%         | 0  | 0.0%  |
| Comprehensive metabolic panel              | No  | 0 | 0.0%  | 3  | 13.0%        | 0  | 0.0%  |
| Mononuclear cell count                     | No  | 2 | 3.5%  | 0  | 0.0%         | 1  | 1.9%  |
| Neutrophil count                           | No  | 1 | 1.8%  | 2  | 8.7%         | 5  | 9.3%  |
| Neutrophil to lymphocyte ratio             | No  | 1 | 0.0%  | 2  | 8.7%         | 5  | 9.3%  |
| Nucleated red blood cells                  | No  | 1 | 1.8%  | 0  | 0.0%         | 0  | 0.0%  |
| pH                                         | No  | 0 | 0.0%  | 0  | 0.0%         | 3  | 5.6%  |
| Platelet count                             | No  | 3 | 5.3%  | 3  | 13.0%        | 5  | 9.3%  |
| Platelet distribution width                | No  | 2 | 3.5%  | 0  | 0.0%         | 0  | 0.0%  |
| Platelet haematocrit                       | No  | 2 | 3.5%  | 0  | 0.0%         | 0  | 0.0%  |
| Potassium                                  | No  | 0 | 0.0%  | 0  | 0.0%         | 4  | 7.4%  |
| Prealbumin                                 | No  | 0 | 0.0%  | 0  | 0.0%         | 1  | 1.9%  |
| Procalcitonin                              | No  | 0 | 0.0%  | 1  | 4.3%         | 1  | 1.9%  |
| Red cell count                             | No  | 0 | 0.0%  | 1  | 4.3%         | 0  | 0.0%  |
| Red cell distribution width                | No  | 2 | 3.5%  | 1  | 4.3%         | 1  | 1.9%  |
| SARS-CoV-2 RT-PCR                          | No  | 9 | 15.8% | 1  | 4.3%         | 0  | 0.0%  |
| Sodium                                     | No  | 0 | 0.0%  | 0  | 0.0%         | 3  | 5.6%  |
| Total protein                              | No  | 0 | 0.0%  | 0  | 0.0%         | 1  | 1.9%  |
| Troponin                                   | No  | 0 | 0.0%  | 3  | 13.0%        | 1  | 1.9%  |
| Urea                                       | No  | 0 | 0.0%  | 1  | 4.3%         | 3  | 5.6%  |
| White blood cell count                     | No  | 0 | 0.0%  | 2  | 8.7%         | 2  | 3.7%  |
| <b>IMAGING INVESTIGATIONS (n=3)</b>        |     |   |       |    |              |    |       |
| Chest X-ray                                | No  | 4 | 7.0%  | 8  | <b>34.8%</b> | 7  | 13.0% |
| Chest CT                                   | No  | 9 | 15.8% | 10 | <b>43.5%</b> | 3  | 5.6%  |
| Lung ultrasound                            | No  | 5 | 8.8%  | 8  | <b>34.8%</b> | 2  | 3.7%  |
| <b>SIGNS AND SYMPTOMS (n=37)</b>           |     |   |       |    |              |    |       |
| Abdominal pain                             | Yes | 0 | 0.0%  | 1  | 4.3%         | 0  | 0.0%  |

|                                  |     |    |       |   |      |   |      |
|----------------------------------|-----|----|-------|---|------|---|------|
| Anosmia / agueisa                | Yes | 4  | 7.0%  | 0 | 0.0% | 1 | 1.9% |
| Any COVID-related symptoms       | Yes | 10 | 17.5% | 1 | 4.3% | 0 | 0.0% |
| Any respiratory symptoms         | Yes | 26 | 45.6% | 0 | 0.0% | 0 | 0.0% |
| Arthralgia                       | Yes | 1  | 1.8%  | 0 | 0.0% | 0 | 0.0% |
| Chest distress                   | Yes | 2  | 3.5%  | 0 | 0.0% | 0 | 0.0% |
| Chest pain                       | Yes | 3  | 5.3%  | 0 | 0.0% | 0 | 0.0% |
| Chest tightness                  | Yes | 1  | 1.8%  | 0 | 0.0% | 0 | 0.0% |
| Chills                           | Yes | 6  | 10.5% | 0 | 0.0% | 0 | 0.0% |
| Conjunctival congestion          | Yes | 1  | 1.8%  | 0 | 0.0% | 0 | 0.0% |
| Constipation                     | Yes | 0  | 0.0%  | 1 | 4.3% | 0 | 0.0% |
| Convulsions                      | Yes | 0  | 0.0%  | 1 | 4.3% | 0 | 0.0% |
| Cough                            | Yes | 23 | 40.4% | 0 | 0.0% | 2 | 3.7% |
| Cyanosis                         | Yes | 0  | 0.0%  | 1 | 4.3% | 0 | 0.0% |
| Diarrhoea                        | Yes | 3  | 5.3%  | 1 | 4.3% | 0 | 0.0% |
| Dizziness                        | Yes | 1  | 1.8%  | 0 | 0.0% | 0 | 0.0% |
| Duration of fever                | Yes | 2  | 3.5%  | 0 | 0.0% | 0 | 0.0% |
| Duration of symptoms             | Yes | 0  | 0.0%  | 2 | 8.7% | 1 | 1.9% |
| Fatigue                          | Yes | 1  | 1.8%  | 0 | 0.0% | 1 | 1.9% |
| Fever                            | Yes | 31 | 54.4% | 2 | 8.7% | 3 | 5.6% |
| Frequency of cough               | Yes | 1  | 1.8%  | 0 | 0.0% | 0 | 0.0% |
| Gastrointestinal symptoms        | Yes | 1  | 1.8%  | 0 | 0.0% | 0 | 0.0% |
| Haematemesis                     | Yes | 0  | 0.0%  | 2 | 8.7% | 0 | 0.0% |
| Haemoptysis                      | Yes | 0  | 0.0%  | 0 | 0.0% | 2 | 3.7% |
| Headache                         | Yes | 1  | 1.8%  | 1 | 4.3% | 1 | 1.9% |
| Inability to breastfeed or drink | Yes | 0  | 0.0%  | 1 | 4.3% | 0 | 0.0% |
| Myalgia                          | Yes | 5  | 8.8%  | 0 | 0.0% | 0 | 0.0% |
| Nasal congestion                 | Yes | 3  | 5.3%  | 0 | 0.0% | 1 | 1.9% |
| Nausea                           | Yes | 1  | 1.8%  | 1 | 4.3% | 0 | 0.0% |
| Rash                             | Yes | 1  | 1.8%  | 0 | 0.0% | 0 | 0.0% |
| Rhinorrhoea                      | Yes | 2  | 3.5%  | 1 | 4.3% | 0 | 0.0% |
| Shortness of breath              | Yes | 16 | 28.1% | 0 | 0.0% | 5 | 9.3% |
| Sore throat                      | Yes | 5  | 8.8%  | 0 | 0.0% | 1 | 1.9% |
| Sputum production                | Yes | 2  | 3.5%  | 0 | 0.0% | 0 | 0.0% |
| Unconsciousness                  | Yes | 0  | 0.0%  | 1 | 4.3% | 1 | 1.9% |
| Unspecified signs and symptoms   | Yes | 1  | 1.8%  | 1 | 4.3% | 0 | 0.0% |
| Vomiting                         | Yes | 1  | 1.8%  | 1 | 4.3% | 0 | 0.0% |

| <b>VITAL SIGNS (n=17)</b>              |     |    |       |    |       |    |       |
|----------------------------------------|-----|----|-------|----|-------|----|-------|
| Altered mental status                  | Yes | 1  | 1.8%  | 3  | 13.0% | 5  | 9.3%  |
| AVPU scale                             | Yes | 0  | 0.0%  | 1  | 4.3%  | 0  | 0.0%  |
| Clinical gestalt                       | Yes | 1  | 1.8%  | 1  | 4.3%  | 1  | 1.9%  |
| Diastolic blood pressure               | Yes | 0  | 0.0%  | 3  | 13.0% | 1  | 1.9%  |
| Exertional oxygen saturation           | Yes | 0  | 0.0%  | 1  | 4.3%  | 0  | 0.0%  |
| FiO2                                   | Yes | 0  | 0.0%  | 0  | 0.0%  | 1  | 1.9%  |
| Glasgow Coma Scale                     | Yes | 0  | 0.0%  | 4  | 17.4% | 4  | 7.4%  |
| Haemodynamic instability               | Yes | 1  | 1.8%  | 1  | 4.3%  | 0  | 0.0%  |
| Heart rate                             | Yes | 1  | 1.8%  | 4  | 17.4% | 8  | 14.8% |
| Hypercapnia                            | No  | 1  | 1.8%  | 0  | 0.0%  | 0  | 0.0%  |
| Oxygen saturation                      | Yes | 9  | 15.8% | 14 | 60.9% | 8  | 14.8% |
| Pain severity                          | Yes | 0  | 0.0%  | 1  | 4.3%  | 0  | 0.0%  |
| PaO2/FiO2 < 300                        | No  | 0  | 0.0%  | 4  | 17.4% | 0  | 0.0%  |
| Respiratory rate                       | Yes | 2  | 3.5%  | 13 | 56.5% | 16 | 29.6% |
| Systolic blood pressure                | Yes | 1  | 1.8%  | 9  | 39.1% | 9  | 16.7% |
| Temperature                            | Yes | 17 | 29.8% | 5  | 21.7% | 13 | 24.1% |
| Altered mental status                  | Yes | 1  | 1.8%  | 2  | 8.7%  | 5  | 9.3%  |
| <b>OTHER CHARACTERISTICS (n=7)</b>     |     |    |       |    |       |    |       |
| Ability to live and walk independently | Yes | 1  | 1.8%  | 0  | 0.0%  | 0  | 0.0%  |
| Abnormal ECG findings                  | No  | 0  | 0.0%  | 1  | 4.3%  | 0  | 0.0%  |
| Score on the Braden scale              | Yes | 0  | 0.0%  | 0  | 0.0%  | 0  | 0.0%  |
| Epidemiological history                | Yes | 36 | 63.2% | 2  | 8.7%  | 2  | 3.7%  |
| Nursing home resident                  | Yes | 0  | 0.0%  | 1  | 4.3%  | 1  | 1.9%  |
| Status as a healthcare worker          | Yes | 2  | 3.5%  | 0  | 0.0%  | 0  | 0.0%  |
| Use of prescription medications        | Yes | 0  | 0.0%  | 1  | 4.3%  | 0  | 0.0%  |



Supplementary Table 6: Overview of use of established prognostication tools for COVID-19.

| Tool                                 | No. inputs | Inputs                                                                                                                                                                                                                                                                                                                                                                                                                                                                                                                                                                                                                   | Feasible in low-resource settings? | No. studies using tool |
|--------------------------------------|------------|--------------------------------------------------------------------------------------------------------------------------------------------------------------------------------------------------------------------------------------------------------------------------------------------------------------------------------------------------------------------------------------------------------------------------------------------------------------------------------------------------------------------------------------------------------------------------------------------------------------------------|------------------------------------|------------------------|
| APACHE II Score(95)                  | 15         | <ul style="list-style-type: none"> <li>• Acute renal failure</li> <li>• Age</li> <li>• Creatinine</li> <li>• FiO2</li> <li>• Glasgow Coma Scale</li> <li>• Haematocrit</li> <li>• Heart rate</li> <li>• History of severe organ failure or immunocompromise</li> <li>• Mean arterial pressure</li> <li>• pH</li> <li>• Potassium</li> <li>• Respiratory rate</li> <li>• Sodium</li> <li>• Temperature</li> <li>• White blood cell count</li> </ul>                                                                                                                                                                       | No                                 | 1                      |
| Clinical Frailty Score               | 1          | <ul style="list-style-type: none"> <li>• Level of physical fitness</li> </ul>                                                                                                                                                                                                                                                                                                                                                                                                                                                                                                                                            | Yes                                | 3                      |
| CURB-65 Score for Pneumonia Severity | 5          | <ul style="list-style-type: none"> <li>• Age</li> <li>• Blood urea nitrogen</li> <li>• Confusion</li> <li>• Respiratory rate</li> <li>• Systolic or diastolic blood pressure</li> </ul>                                                                                                                                                                                                                                                                                                                                                                                                                                  | No                                 | 4                      |
| Deyo-Charlson Score(96)              | 17         | <ul style="list-style-type: none"> <li>• AIDS</li> <li>• Any malignancy</li> <li>• Cerebrovascular disease</li> <li>• Chronic pulmonary disease</li> <li>• Congestive heart failure</li> <li>• Dementia</li> <li>• Diabetes with complications</li> <li>• Diabetes without chronic complications</li> <li>• Hemiplegia or paraplegia</li> <li>• Metastatic solid tumour</li> <li>• Mild liver disease</li> <li>• Moderate/severe liver disease</li> <li>• Myocardial infarction</li> <li>• Peptic ulcer disease</li> <li>• Peripheral vascular disease</li> <li>• Renal disease</li> <li>• Rheumatoid disease</li> </ul> | Yes                                | 1                      |
| HEWS                                 |            | <ul style="list-style-type: none"> <li>•</li> </ul>                                                                                                                                                                                                                                                                                                                                                                                                                                                                                                                                                                      |                                    |                        |
| Korean Triage and Acuity Scale(97)   | 17         | <ul style="list-style-type: none"> <li>• Abdominal pain</li> <li>• Bites</li> <li>• Cardiac arrest</li> <li>• Chest pain</li> <li>• Constipation</li> <li>• Diarrhoea</li> <li>• Glasgow Coma Scale</li> <li>• Haematemesis</li> <li>• Headache</li> <li>• Major trauma</li> </ul>                                                                                                                                                                                                                                                                                                                                       | Yes                                | 1                      |

|                                                                    |    |                                                                                                                                                                                                                                                                                                                                                                                                                                                                                                                                                                                                       |     |   |
|--------------------------------------------------------------------|----|-------------------------------------------------------------------------------------------------------------------------------------------------------------------------------------------------------------------------------------------------------------------------------------------------------------------------------------------------------------------------------------------------------------------------------------------------------------------------------------------------------------------------------------------------------------------------------------------------------|-----|---|
|                                                                    |    | <ul style="list-style-type: none"> <li>• Nausea and/or vomiting</li> <li>• Prescription medications</li> <li>• Respiratory failure</li> <li>• Systolic blood pressure</li> <li>• Systemic inflammatory response syndrome (SIRS)</li> <li>• Temperature</li> <li>• Urinary tract infection</li> </ul>                                                                                                                                                                                                                                                                                                  |     |   |
| Modified 6-Minute Walk Test(98)                                    | 1  | <ul style="list-style-type: none"> <li>• Distance walked in 6 minutes</li> </ul>                                                                                                                                                                                                                                                                                                                                                                                                                                                                                                                      | Yes | 1 |
| Modified Early Warning Score (MEWS) for Clinical Deterioration(99) | 5  | <ul style="list-style-type: none"> <li>• AVPU score</li> <li>• Heart rate</li> <li>• Respiratory rate</li> <li>• Systolic blood pressure</li> <li>• Temperature</li> </ul>                                                                                                                                                                                                                                                                                                                                                                                                                            | Yes | 1 |
| MuLBSTA Score for Viral Pneumonia Mortality(100)                   | 6  | <ul style="list-style-type: none"> <li>• Absolute lymphocyte count</li> <li>• Age</li> <li>• Bacterial coinfection</li> <li>• History of hypertension</li> <li>• Multilobe infiltrate</li> <li>• Smoking history</li> </ul>                                                                                                                                                                                                                                                                                                                                                                           | No  | 1 |
| National Early Warning Score (NEWS)(101)                           | 5  | <ul style="list-style-type: none"> <li>• Need for supplemental oxygen</li> <li>• Oxygen saturation</li> <li>• Respiratory rate</li> <li>• Systolic blood pressure</li> <li>• Temperature</li> </ul>                                                                                                                                                                                                                                                                                                                                                                                                   | Yes | 4 |
| National Early Warning Score 2 (NEWS2)(102)                        | 7  | <ul style="list-style-type: none"> <li>• Consciousness</li> <li>• Heart rate</li> <li>• Hypercapnic respiratory failure</li> <li>• Need for supplemental oxygen</li> <li>• Respiratory rate</li> <li>• Systolic blood pressure</li> <li>• Temperature</li> </ul>                                                                                                                                                                                                                                                                                                                                      | Yes | 5 |
| Pneumonia Severity Index for Community Acquired Pneumonia(103)     | 19 | <ul style="list-style-type: none"> <li>• Age</li> <li>• Altered mental status</li> <li>• Blood urea nitrogen</li> <li>• Glucose</li> <li>• Haematocrit</li> <li>• Heart rate</li> <li>• History of congestive heart failure</li> <li>• History of liver disease history</li> <li>• History of renal disease</li> <li>• Neoplastic disease</li> <li>• Nursing home resident</li> <li>• Partial pressure of oxygen</li> <li>• pH</li> <li>• Pleural effusion on X-ray</li> <li>• Respiratory rate</li> <li>• Sex</li> <li>• Sodium</li> <li>• Systolic blood pressure</li> <li>• Temperature</li> </ul> | No  | 1 |
| qSOFA (Quick SOFA) Score for Sepsis(104) SEWS                      | 3  | <ul style="list-style-type: none"> <li>• Glasgow Coma Scale</li> <li>• Respiratory rate</li> <li>• Systolic blood pressure</li> </ul>                                                                                                                                                                                                                                                                                                                                                                                                                                                                 | Yes | 5 |

## REFERENCES

1. Al-Tawfiq JA, Garout MA, Gautret P. Preparing for emerging respiratory pathogens such as SARS-CoV, MERS-CoV, and SARS-CoV-2. *Infez Med*. 2020;28(suppl 1):64-70.
2. Aldobyany A, Touman A, Ghaleb N, et al. Correlation Between the COVID-19 Respiratory Triage Score and SARS-COV-2 PCR Test. *Front Med (Lausanne)* 2020;7:605689. doi: 10.3389/fmed.2020.605689
3. Agarwal A, Nagi N, Chatterjee P, Sarkar S, Mourya D, Sahay RR, et al. Guidance for building a dedicated health facility to contain the spread of the 2019 novel coronavirus outbreak. *Indian J Med Res*. 2020;151(2 & 3):177-83.
4. Augustin M, Schommers P, Suarez I, Koehler P, Gruell H, Klein F, et al. Rapid response infrastructure for pandemic preparedness in a tertiary care hospital: lessons learned from the COVID-19 outbreak in Cologne, Germany, February to March 2020. *Euro Surveill*. 2020;25(21).
5. Ayebare RR, Flick R, Okware S, Bodo B, Lamorde M. Adoption of COVID-19 triage strategies for low-income settings. *Lancet Respir Med*. 2020;8(4):e22.
6. Cabitza F, Campagner A, Ferrari D, et al. Development, evaluation, and validation of machine learning models for COVID-19 detection based on routine blood tests. *Clinical Chemistry and Laboratory Medicine* 2021;59(2):421-31. doi: 10.1515/cclm-2020-1294
7. Cao Y, Li Q, Chen J, Guo X, Miao C, Yang H, et al. Hospital Emergency Management Plan During the COVID-19 Epidemic. *Acad Emerg Med*. 2020;27(4):309-11.
8. Carenzo L, Costantini E, Greco M, Barra FL, Rendiniello V, Mainetti M, et al. Hospital surge capacity in a tertiary emergency referral centre during the COVID-19 outbreak in Italy. *Anaesthesia*. 2020;75(7):928-34.
9. Standard Operating Procedure for Triage of suspected COVID-19 patients in non-US Healthcare settings. Atlanta: Centers for Disease Control and Prevention.
10. Chan PF, Lai KPL, Chao DVK, Fung SCK. Enhancing the triage and cohort of patients in public primary care clinics in response to the coronavirus disease 2019 (COVID-19) in Hong Kong: an experience from a hospital cluster. *BJGP Open*. 2020;4(2).
11. Chang YT, Lin CY, Tsai MJ, Hung CT, Hsu CW, Lu PL, et al. Infection control measures of a Taiwanese hospital to confront the COVID-19 pandemic. *Kaohsiung J Med Sci*. 2020;36(5):296-304.
12. Chen S, Zhang Z, Yang J, Wang J, Zhai X, Barnighausen T, et al. Fangcang shelter hospitals: a novel concept for responding to public health emergencies. *Lancet*. 2020;395(10232):1305-14.
13. Cheng VCC, Wong SC, Chen JHK, Yip CCY, Chuang VWM, Tsang OTY, et al. Escalating infection control response to the rapidly evolving epidemiology of the coronavirus disease 2019 (COVID-19) due to SARS-CoV-2 in Hong Kong. *Infect Control Hosp Epidemiol*. 2020;41(5):493-8.
14. Chou E, Hsieh YL, Wolfshohl J, Green F, Bhakta T. Onsite telemedicine strategy for coronavirus (COVID-19) screening to limit exposure in ED. *Emerg Med J*. 2020;37(6):335-7.
15. Chowdhury JM, Patel M, Zheng M, Abramian O, Criner GJ. Mobilization and Preparation of a Large Urban Academic Center during the COVID-19 Pandemic. *Ann Am Thorac Soc*. 2020;17(8):922-5.
16. Chung HS, Lee DE, Kim JK, Yeo IH, Kim C, Park J, et al. Revised Triage and Surveillance Protocols for Temporary Emergency Department Closures in Tertiary Hospitals as a Response to COVID-19 Crisis in Daegu Metropolitan City. *J Korean Med Sci*. 2020;35(19):e189.
17. Devrim I, Bayram N. Infection control practices in children during COVID-19 pandemic: Differences from adults. *Am J Infect Control*. 2020;48(8):933-9.7.

18. Duca A, Piva S, Foca E, Latronico N, Rizzi M. Calculated Decisions: Brescia-COVID Respiratory Severity Scale (BCRSS)/Algorithm. *Emerg Med Pract.* 2020;22(5 Suppl):CD1-CD2.
19. Erika P, Andrea V, Cillis MG, Ioannilli E, Iannicelli T, Andrea M. Triage decision-making at the time of COVID-19 infection: the Piacenza strategy. *Intern Emerg Med.* 2020;15(5):879-82.
20. Gibbons RC, Magee M, Goett H, et al. Lung Ultrasound vs. Chest X-Ray Study for the Radiographic Diagnosis of COVID-19 Pneumonia in a High-Prevalence Population. *J Emerg Med* 2021 doi: 10.1016/j.jemermed.2021.01.041
21. Gilbert A, Brasseur E, Petit M, Donneau AF, Diep A, Hetzel Campbell S, et al. Immersion in an emergency department triage center during the Covid-19 outbreak: first report of the Liege University hospital experience. *Acta Clin Belg.* 2020:1-7.
22. Guo F, Du Z, Wang T. An effective screening and management process in the outpatient clinic for patients requiring hospitalization during the COVID-19 pandemic. *J Med Virol.* 2020.
23. He H, Hu C, Xiong N, Liu C, Huang X. How to transform a general hospital into an "infectious disease hospital" during the epidemic of COVID-19. *Crit Care.* 2020;24(1).
24. Howitt R, de Jesus GA, Araujo F, Francis J, Marr I, McVean M, et al. Screening and triage at health-care facilities in Timor-Leste during the COVID-19 pandemic. *Lancet Respir Med.* 2020;8(6):e43.
25. Huang T, Guo Y, Li S, Zheng Y, Lei L, Zeng X, et al. Application and effects of fever screening system in the prevention of nosocomial infection in the only designated hospital of coronavirus disease 2019 (COVID-19) in Shenzhen, China. *Infect Control Hosp Epidemiol.* 2020;41(8):978-81.
26. Jaffe E, Stugo R, Bin E, Blustein O, Rosenblat I, Alpert E, et al. The role of emergency medical services in containing COVID-19. *J Emerg Med.* 2020;38:1526-7.
27. Karimi A, Tabatabaei S, Rajabnejad, Pourmoghaddas Z, Rahimi H, Armin S, et al. An algorithmic approach to diagnosis and treatment of coronavirus disease 2019 (COVID-19) in children: Iranian expert's consensus statement. *Arch Pediatr Infect Dis.* 2020.
28. Koenig KL, Bey CK, McDonald EC. 2019-nCoV: The Identify-Isolate-Inform (3I) Tool Applied to a Novel Emerging Coronavirus. *West J Emerg Med.* 2020;21(2):184-90.
29. Li T. Diagnosis and clinical management of severe acute respiratory syndrome Coronavirus 2 (SARS-CoV-2) infection: an operational recommendation of Peking Union Medical College Hospital (V2.0). *Emerg Microbes Infect.* 2020;9(1):582-5.
30. Lin CH, Tseng WP, Wu JL, Tay J, Cheng MT, Ong HN, et al. A Double Triage and Telemedicine Protocol to Optimize Infection Control in an Emergency Department in Taiwan During the COVID-19 Pandemic: Retrospective Feasibility Study. *J Med Internet Res.* 2020;22(6):e20586.
31. Liu L, Hong X, Su X, Chen H, Zhang D, Tang S, et al. Optimizing screening strategies for coronavirus disease 2019: A study from Middle China. *J Infect Public Health.* 2020;13(6):868-72.
32. Liu Y, Wang Z, Ren J, Tian Y, Zhou M, Zhou T, et al. A COVID-19 Risk Assessment Decision Support System for General Practitioners: Design and Development Study. *J Med Internet Res.* 2020;22(6):e19786.
30. Meschi T, Rossi S, Volpi A, Ferrari C, Sverzellati N, Brianti E, et al. Reorganization of a large academic hospital to face COVID-19 outbreak: The model of Parma, Emilia-Romagna region, Italy. *Eur J Clin Invest.* 2020;50(6):e13250.
31. Möckel M, Bachmann U, Behringer W, Pfafflin F, Stegemann MS. How emergency departments prepare for virus disease outbreaks like COVID-19. *Eur J Emerg Med.* 2020;27(3):161-2.

32. Nayan N, Kumar MK, Nair RK, et al. Clinical Triage in Cough Clinic Alleviates COVID-19 Overload in Emergency Department in India. *SN Compr Clin Med* 2021;1-6. doi: 10.1007/s42399-020-00705-2
33. Nicastro E, Mazza A, Gervasoni A, Di Giorgio A, D'Antiga L. A Pediatric Emergency Department Protocol to Avoid Intrahospital Spread of SARS-CoV-2 during the Outbreak in Bergamo, Italy. *J Pediatr*. 2020;222:231-5.
34. Piliago C, Strumia A, Stone MB, Pascarella G. The ultrasound guided triage: a new tool for prehospital management of COVID-19 pandemic. *Anesth Analg*. 2020.
35. Pu H, Xu Y, Doig G, Zhou Y. Screening and managing of suspected or confirmed novel coronavirus (COVID-19) patients: experiences from a tertiary hospital outside Hubei province. 2020.
36. Quah LJJ, Tan BKK, Fua TP, Wee CPJ, Lim CS, Nadarajan G, et al. Reorganising the emergency department to manage the COVID-19 outbreak. *Int J Emerg Med*. 2020;13(1):32.
37. Romero-Gameros CA, Colin-Martínez T, Waizel-Haiat S, et al. Diagnostic accuracy of symptoms as a diagnostic tool for SARS-CoV 2 infection: a cross-sectional study in a cohort of 2,173 patients. *BMC Infect Dis* 2021;21(1):255. doi: 10.1186/s12879-021-05930-1
38. Schwedhelm MM, Herstein JJ, Watson SM, Mead AL, Maddalena L, Liston DD, et al. Can You Catch It? Lessons Learned and Modification of ED Triage Symptom- and Travel-Screening Strategy. *J Emerg Nurs*. 2020.
39. Shen Y, Cui Y, Li N, Tian C, Chen M, Zhang YW, et al. Emergency Responses to Covid-19 Outbreak: Experiences and Lessons from a General Hospital in Nanjing, China. *Cardiovasc Intervent Radiol*. 2020;43(6):810-9.
40. Shi Y, Wang X, Liu G, Zhu Q, Wang J, Yu H, et al. A quickly, effectively screening process of novel corona virus disease 2019 (COVID-19) in children in Shanghai, China. *Ann Transl Med*. 2020;8(5):241.
41. Spina S, Marrazzo F, Migliari M, Stucchi R, Sforza A, Fumagalli R. The response of Milan's Emergency Medical System to the COVID-19 outbreak in Italy. *Lancet*. 2020;395(10227):e49-e50.
42. Tan GSE, Ang H, Manauis CM, Chua JM, Gao CQ, Ng FKK, et al. Reducing hospital admissions for COVID-19 at a dedicated screening centre in Singapore. *Clin Microbiol Infect*. 2020;26(9):1278-9.
43. Wang Q, Wang X, Lin H. The role of triage in the prevention and control of COVID-19. *Infect Control Hosp Epidemiol*. 2020:1-5.
44. Wang X, Chen Y, Li Z, Wang D, Wang Y. Providing uninterrupted care during COVID-19 pandemic: experience from Beijing Tiantan Hospital. *Stroke Vasc Neurol*. 2020;5(2):180-4.
45. Wee LE, Fua TP, Chua YY, Ho AFW, Sim XYJ, Conceicao EP, et al. Containing COVID-19 in the Emergency Department: The Role of Improved Case Detection and Segregation of Suspect Cases. *Acad Emerg Med*. 2020;27(5):379-87.
46. Whiteside T, Kane E, Aljohani B, Alsamman M, Pourmand A. Redesigning emergency department operations amidst a viral pandemic. *Am J Emerg Med*. 2020;38(7):1448-53.
47. Clinical management of severe acute respiratory infection (SARI) when COVID-19 disease is suspected. Interim guidance, 13 March 2020. Geneva: World Health Organization; 2020.
48. Wu X, Zhou H, Wu X, Huang W, Jia B. Strategies for qualified triage stations and fever clinics during the outbreak of COVID-2019 in the county hospitals of Western Chongqing. *J Hosp Infect*. 2020;105(2):128-9.

49. Zhang J, Zhou L, Yang Y, Peng W, Wang W, Chen X. Therapeutic and triage strategies for 2019 novel coronavirus disease in fever clinics. *Lancet Respir Med*. 2020;8(3):e11-e2.
50. Zhang N, Deng Y, Li W, Liu J, Li H, Liu E, et al. Analysis and suggestions for the preview and triage screening of children with suspected COVID-19 outside the epidemic area of Hubei Province. *Transl Pediatr*. 2020;9(2):126-32.
51. Zhao Y, Cui C, Zhang K, Liu J, Xu J, Nisenbaum E, et al. COVID19: A Systematic Approach to Early Identification and Healthcare Worker Protection. *Front Public Health*. 2020;8:205.
52. Zhou TT, Wei FX. Primary stratification and identification of suspected Corona virus disease 2019 (COVID-19) from clinical perspective by a simple scoring proposal. *Mil Med Res*. 2020;7(1):16.
53. Zimmerman RK, Nowalk MP, Bear T, Taber R, Sax TM, Eng H, et al. Proposed Clinical Indicators for Efficient Screening and Testing for COVID-19 Infection from Classification and Regression Trees (CART) Analysis. *medRxiv*. 2020.
54. Zou T, Yin W, Kang Y. Application of Critical Care Ultrasound in Patients With COVID-19: Our Experience and Perspective. *IEEE Trans Ultrason Ferroelectr Freq Control* 2020;67(11):2197-206. doi: 10.1109/TUFFC.2020.3020628
55. Abrams ER, Rose G, Fields JM, et al. Point-of-Care Ultrasound in the Evaluation of COVID-19. *J Emerg Med* 2020;59(3):403-08. doi: 10.1016/j.jemermed.2020.06.032
56. Emergency Department COVID-19 Severity Classification: American College of Emergency Physicians; [Available from: [https://www.acep.org/globalassets/sites/acep/media/covid-19-main/acep\\_evidencecare\\_covid19severitytool.pdf](https://www.acep.org/globalassets/sites/acep/media/covid-19-main/acep_evidencecare_covid19severitytool.pdf)].
57. Côté A, Ternacle J, Pibarot P. Early prediction of the risk of severe coronavirus disease 2019: A key step in therapeutic decision making. *EBioMedicine*. 2020;59:102948.
58. Duggan NM, Liteplo AS, Shokoohi H, et al. Using Lung Point-of-care Ultrasound in Suspected COVID-19: Case Series and Proposed Triage Algorithm. *Clinical practice and cases in emergency medicine* 2020;4(3):289-94. doi: <https://dx.doi.org/10.5811/cpcem.2020.7.47912>
59. Eggleton EJ. Simple, fast and affordable triaging pathway for COVID-19. *Postgrad Med J* 2021;97(1145):192-95. doi: 10.1136/postgradmedj-2020-138029
60. Her M. How Is COVID-19 Affecting South Korea? What Is Our Current Strategy? *Disaster Med Public Health Prep* 2020;14(5):684-86. doi: 10.1017/dmp.2020.69
61. Manivel V, Lesnewski A, Shamim S, Carbonatto G, Govindan T. CLUE: COVID-19 lung ultrasound in emergency department. *Emerg Med Australas*. 2020;32(4):694-6.
62. Mantha S, Tripuraneni SL, Roizen MF, Fleisher LA. Proposed Modifications in the 6-Minute Walk Test for Potential Application in Patients With Mild COVID-19: A Step to Optimize Triage Guidelines. *Anesth Analg*. 2020;131(2):398-402.
63. Momeni-Boroujeni A, Mendoza R, Stopard IJ, et al. A Dynamic Bayesian Model for Identifying High-Mortality Risk in Hospitalized COVID-19 Patients. *Infect Dis Rep* 2021;13(1):239-50. doi: 10.3390/idr13010027
64. Rajalingam B, Narayanan E, Nirmalan P, et al. Pattern recognition of high-resolution computer tomography (HRCT) chest to guide clinical management in patients with mild to moderate COVID-19. *Indian J Radiol Imaging* 2021;31(Suppl 1):S110-S18. doi: 10.4103/ijri.IJRI\_774\_20
65. Sun H, Jain A, Leone MJ, Alabsi HS, Brenner LN, Ye E, et al. COVID-19 Outpatient Screening: a Prediction Score for Adverse Events. *medRxiv*. 2020.
66. Sun Q, Qiu H, Huang M, Yang Y. Lower mortality of COVID-19 by early recognition and intervention: experience from Jiangsu Province. *Ann Intensive Care*. 2020;10(1):33.

67. Ali R, Qayyum F, Ahmed N, et al. Isaric 4c Mortality Score As A Predictor Of In-Hospital Mortality In Covid-19 Patients Admitted In Ayub Teaching Hospital During First Wave Of The Pandemic. *J Ayub Med Coll Abbottabad* 2021;33(1):20-25.
68. Bartoletti M, Giannella M, Scudeller L, Tedeschi S, Rinaldi M, Bussini L, et al. Development and validation of a prediction model for severe respiratory failure in hospitalized patients with SARS-CoV-2 infection: a multicentre cohort study (PREDI-CO study). *Clin Microbiol Infect.* 2020.
69. Brahier T, Meuwly JY, Pantet O, et al. Lung ultrasonography for risk stratification in patients with COVID-19: a prospective observational cohort study. *Clin Infect Dis* 2020 doi: 10.1093/cid/ciaa1408
70. Bi X, Su Z, Yan H, Du J, Wang J, Chen L, et al. Prediction of severe illness due to COVID-19 based on an analysis of initial Fibrinogen to Albumin Ratio and Platelet count. *Platelets.* 2020;31(5):674-9.
71. Cozzi D, Albanesi M, Cavigli E, Moroni C, Bindi A, Luvara S, et al. Chest X-ray in new Coronavirus Disease 2019 (COVID-19) infection: findings and correlation with clinical outcome. *Radiol Med.* 2020;125(8):730-7.
72. Das AK, Mishra S, Saraswathy Gopalan S. Predicting CoVID-19 community mortality risk using machine learning and development of an online prognostic tool. *PeerJ* 2020;8:e10083. doi: 10.7717/peerj.10083
73. Dong Y, Zhou H, Li M, Zhang Z, Guo W, Yu T, et al. A novel simple scoring model for predicting severity of patients with SARS-CoV-2 infection. *Transbound Emerg Dis.* 2020.
74. Duan J, Wang X, Chi J, et al. Correlation between the variables collected at admission and progression to severe cases during hospitalization among patients with COVID-19 in Chongqing. *J Med Virol* 2020;92(11):2616-22. doi: 10.1002/jmv.26082
75. Fernandes FT, de Oliveira TA, Teixeira CE, et al. A multipurpose machine learning approach to predict COVID-19 negative prognosis in S, o Paulo, Brazil. *Sci Rep* 2021;11(1):3343. doi: 10.1038/s41598-021-82885-y
76. Frost F, Bradley P, Tharmaratnam K, Wootton D. The utility of established prognostic scores in COVID-19 hospital admissions: a multicentre prospective evaluation of CURB-65, NEWS2, and qSOFA. 2020.
77. Galloway J, Norton S, Barker R, Brookes A, Carey I, Xlarke B, et al. A clinical risk score to identify patients with COVID-19 at high risk of critical care admission or death: An observational cohort study. *J Infect.* 2020;81(2):282-8.
78. Jang JG, Ahn JH. The Author's Response: Prognostic Accuracy of the SIRS, qSOFA, and NEWS for Early Detection of Clinical Deterioration in SARS-CoV-2 Infected Patients. *J Korean Med Sci.* 2020;35(30):e275.
79. Gidari A, De Socio GV, Sabbatini S, Francisci D. Predictive value of National Early Warning Score 2 (NEWS2) for intensive care unit admission in patients with SARS-CoV-2 infection. *Infect Dis (Lond).* 2020;52(10):698-704.
80. Gong J, Ou J, Qui X, Jie Y, Chen Y, Yuan L, et al. A Tool for Early Prediction of Severe Coronavirus Disease 2019 (COVID-19): A Multicenter Study Using the Risk Nomogram in Wuhan and Guangdong, China *Clinical Infectious Diseases.* 2020;71(15):833-81.
81. Gude-Sampedro F, Fernandez-Merino C, Ferreira L, et al. Development and validation of a prognostic model based on comorbidities to predict COVID-19 severity: a population-based study. *Int J Epidemiol* 2021;50(1):64-74. doi: 10.1093/ije/dyaa209
82. Gupta N, Ish P, Kumar R, et al. Evaluation of the clinical profile, laboratory parameters and outcome of two hundred COVID-19 patients from a tertiary centre in India. *Monaldi Arch Chest Dis* 2020;90(4) doi: 10.4081/monaldi.2020.1507
83. Haimovich A, Ravindra N, Stoytchew S, Young H, Wilson F, van Dijk D, et al.

- Development and validation of the quick COVID-19 severity index (qCSI): a prognostic tool for early clinical decompensation. *Ann Emerg Med.* 2020.
84. Hu H, Yao N, Qiu Y. Predictive Value of 5 Early Warning Scores for Critical COVID-19 Patients. *Disaster Med Public Health Prep* 2020;1-8. doi: 10.1017/dmp.2020.324
85. Huespe I, Bisso I, Gemeli N, Terrasa S, Di Stefano S, Biurgos V, et al. COVID-19 Severity Index: predictive score for hospitalized patients. 2020.
86. Ihle-Hansen H, Berge T, Tveita A, Ronning EJ, Erno PE, Andersen EL, et al. COVID-19: Symptoms, course of illness and use of clinical scoring systems for the first 42 patients admitted to a Norwegian local hospital. *Tidsskr Nor Laegeforen.* 2020;140(7).
87. Izquierdo JL, Ancochea J, Soriano JB. Clinical Characteristics and Prognostic Factors for Intensive Care Unit Admission of Patients With COVID-19: Retrospective Study Using Machine Learning and Natural Language Processing. *J Med Internet Res* 2020;22(10):e21801. doi: 10.2196/21801
88. Jehi L, Ji X, Milinovich A, Erzurum S, Merlino A, Gordon S, et al. Development and validation of a model for individualized prediction of hospitalization risk in 4,536 patients with COVID-19. *PLoS One.* 2020;15(8):e0237419.
89. Kaleemi R, Hilal K, Arshad A, et al. The association of chest radiographic findings and severity scoring with clinical outcomes in patients with COVID-19 presenting to the emergency department of a tertiary care hospital in Pakistan. *PLoS One* 2021;16(1):e0244886. doi: 10.1371/journal.pone.0244886
90. Kostakis I, Smith GB, Prytherch D, et al. The performance of the National Early Warning Score and National Early Warning Score 2 in hospitalised patients infected by the severe acute respiratory syndrome coronavirus 2 (SARS-CoV-2). *Resuscitation* 2021;159:150-57. doi: 10.1016/j.resuscitation.2020.10.039
91. Labenz C, Kremer WM, Schattenberg JM, Worns MA, Toenges G, Weinmann A, et al. Clinical Frailty Scale for risk stratification in patients with SARS-CoV-2 infection. *J Investig Med.* 2020;68(6):1199-202.
92. Levenfus I, Ullmann E, Battegay E, Schuurmans MM. Triage tool for suspected COVID-19 patients in the emergency room: AIFELL score. *Braz J Infect Dis.* 2020.
93. Li Q, Zhang J, Ling Y, Li W, Zhang X, Lu H, et al. A simple algorithm helps early identification of SARS-CoV-2 infection patients with severe progression tendency. *Infection.* 2020;48(4):577-84.
94. Liang W, Liang H, Ou L, Chen B, Chen A, Li C, et al. Development and Validation of a Clinical Risk Score to Predict the Occurrence of Critical Illness in Hospitalized Patients With COVID-19. *JAMA Intern Med.* 2020;180(8):1081-9.
95. Liang W, Yao J, Chen A, Lv Q, Zanin M, Liu J, et al. Early triage of critically ill COVID-19 patients using deep learning. *Nat Commun.* 2020;11(1):3543.
96. Ma J, Shi X, Xu W, Lv F, Wu J, Pan Q, et al. Development and validation of a risk stratification model for screening suspected cases of COVID-19 in China. *Aging (Albany NY).* 2020;12(14):13882-94.
97. Myrstad M, Ihle-Hansen H, Tveita AA, Andersen EL, Nygard S, Tveit A, et al. National Early Warning Score 2 (NEWS2) on admission predicts severe disease and in-hospital mortality from Covid-19 - a prospective cohort study. *Scand J Trauma Resusc Emerg Med.* 2020;28(1):66.
98. Nagant C, Ponthieux F, Smet J, et al. A score combining early detection of cytokines accurately predicts COVID-19 severity and intensive care unit transfer. *International Journal of Infectious Diseases* 2020;101:342-45. doi: 10.1016/j.ijid.2020.10.003
99. Nguyen Y, Corre F, Honsel V, Curac S, Zarrouk V, Burtz CP, et al. A nomogram to predict the risk of unfavourable outcome in COVID-19: a retrospective cohort of 279 hospitalized patients in Paris area. *Ann Med.* 2020;52(7):367-75.



100. Osborne TF, Veigulis ZP, Arreola DM, Roosli E, Curtin CM. Automated EHR score to predict COVID-19 outcomes at US Department of Veterans Affairs. *PLoS One*. 2020;15(7):e0236554.
101. Peng X, Subbe CP, Zhang L, Luo Z, Peng L. NEWS can predict deterioration of patients with COVID-19. *Resuscitation*. 2020;152:26-7.
102. Ponsford MJ, Burton RJ, Smith L, et al. Examining the utility of extended laboratory panel testing in the emergency department for risk stratification of patients with COVID-19: a single-centre retrospective service evaluation. *J Clin Pathol* 2021 doi: 10.1136/jclinpath-2020-207157
103. Sablerolles RSG, Lafeber M, van Kempen JAL, et al. Association between Clinical Frailty Scale score and hospital mortality in adult patients with COVID-19 (COMET): an international, multicentre, retrospective, observational cohort study. *Lancet Healthy Longev* 2021;2(3):e163-e70. doi: 10.1016/S2666-7568(21)00006-4
104. Satici C, Demirkol MA, Sargin Altunok E, Gursoy B, Alkan M, Kamat S, et al. Performance of pneumonia severity index and CURB-65 in predicting 30-day mortality in patients with COVID-19. *Int J Infect Dis*. 2020;98:84-9.
105. Schalekamp S, Huisman M, van Dijk RA, Boomsma MF, Freire Jorge PJ, de Boer WS, et al. Model-based Prediction of Critical Illness in Hospitalized Patients with COVID-19. *Radiology*. 2020:202723.
106. Shang JG, Hur J, Hong KS, Lee W, Ahn JH. Prognostic Accuracy of the SIRS, qSOFA, and NEWS for Early Detection of Clinical Deterioration in SARS-CoV-2 Infected Patients. *J Korean Med Sci*. 2020;35(25):e234.
107. Singh K, Valley T, Tang S, Li B, Kamran F, Sjoding M, et al. Evaluating a Widely Implemented Proprietary Deterioration Index Model Among Hospitalized COVID-19 Patients. 2020.
108. Sung J, Choudry N, Bachour R. Development and validation of a simple risk score for diagnosing COVID-19 in the emergency room. *Epidemiol Infect* 2020;148:e273. doi: 10.1017/S0950268820002769
109. Tang G, Luo Y, Lu F, et al. Prediction of Sepsis in COVID-19 Using Laboratory Indicators. *Front Cell Infect Microbiol* 2020;10:586054. doi: 10.3389/fcimb.2020.586054
110. Tsui E, Lui C, Woo P, Cheung A, Lam P, Tang T, et al. Development of a data-driven COVID-19 prognostication tool to inform triage and step-down care for hospitalised patients in Hong Kong: A population based cohort study. 2020.
111. Wollenstein-Betech S, Cassandras CG, Paschalidis IC. Personalized predictive models for symptomatic COVID-19 patients using basic preconditions: Hospitalizations, mortality, and the need for an ICU or ventilator. *Int J Med Inform* 2020;142:104258. doi: 10.1016/j.ijmedinf.2020.104258
112. Wu G, Yang P, Xie Y, Woodruff HC, Rao X, Guiot J, et al. Development of a clinical decision support system for severity risk prediction and triage of COVID-19 patients at hospital admission: an international multicentre study. *Eur Respir J*. 2020;56(2).
113. Xiao LS, Zhang WF, Gong MC, Zhang YP, Chen LY, Zhu HB, et al. Development and validation of the HNC-LL score for predicting the severity of coronavirus disease 2019. *EBioMedicine*. 2020;57:102880.
114. Yasukawa K, Minami T, Boulware DR, et al. Point-of-Care Lung Ultrasound for COVID-19: Findings and Prognostic Implications From 105 Consecutive Patients. *J Intensive Care Med* 2021;36(3):334-42. doi: 10.1177/0885066620988831
115. Zhang C, Qin L, Li K, Wang Q, Zhao Y, Xu B, et al. A Novel Scoring System for Prediction of Disease Severity in COVID-19. *Front Cell Infect Microbiol*. 2020;10:318.
116. Zhang S, Guo M, Duan L, Wu F, Hu G, Wang Z, et al. Development and validation of a risk factor-based system to predict short-term survival in adult hospitalized patients with COVID-19: a multicenter, retrospective, cohort study. *Crit Care*. 2020;24(1):438.

117. Zhao L, Yu K, Zhao Q, Tian R, Xie H, Xie L, et al. Lung Ultrasound Score in Evaluating the Severity of Coronavirus Disease 2019 (COVID-19) Pneumonia. *Ultrasound Med Biol*. 2020.
118. Zhou Y, He Y, Yang H, Yu H, Wang T, Chen Z, et al. Development and validation a nomogram for predicting the risk of severe COVID-19: A multi-center study in Sichuan, China. *PLoS One*. 2020;15(5):e0233328.
119. Zhu JS, Ge P, Jiang C, Zhang Y, Li X, Zhao Z, et al. Deep-learning artificial intelligence analysis of clinical variables predicts mortality in COVID-19 patients. *J Am Coll Emerg Physicians Open*. 2020.
120. Zou X, Li S, Fang M, Hu M, Bian Y, Ling J, et al. Acute Physiology and Chronic Health Evaluation II Score as a Predictor of Hospital Mortality in Patients of Coronavirus Disease 2019. *Crit Care Med*. 2020;48(8):e657-e65.
121. APACHE II Score: MDCalc; [Available from: <https://www.mdcalc.com/apache-ii-score>].
122. Ladha KS, Zhao K, Quraishi SA, Kurth T, Eikermann M, Kaafarani HM, et al. The Deyo-Charlson and Elixhauser-van Walraven Comorbidity Indices as predictors of mortality in critically ill patients. *BMJ Open*. 2015;5(9):e008990.
123. Ryu JH, Min MK, Lee DS, Yeom SR, Lee SH, Wang IJ, et al. Changes in Relative Importance of the 5-Level Triage System, Korean Triage and Acuity Scale, for the Disposition of Emergency Patients Induced by Forced Reduction in Its Level Number: a Multi-Center Registry-based Retrospective Cohort Study. *J Korean Med Sci*. 2019;34(14):e114.
124. Laboratories ATSCoPSfCPF. ATS statement: guidelines for the six-minute walk test. *Am J Respir Crit Care Med*. 2002;166(1):111-7.
126. Modified Early Warning Score (MEWS) for Clinical Deterioration: MDCalc; [Available from: <https://www.mdcalc.com/modified-early-warning-score-mews-clinical-deterioration>].
125. MuLBSTA Score for Viral Pneumonia Mortality: MDCalc; [Available from: <https://www.mdcalc.com/mulbsta-score-viral-pneumonia-mortality>].
126. National Early Warning Score (NEWS): MDCalc; [Available from: <https://www.mdcalc.com/national-early-warning-score-news>].
127. National Early Warning Score (NEWS) 2: MDCalc; [Available from: <https://www.mdcalc.com/national-early-warning-score-news-2>].
128. PSI/PORT Score: Pneumonia Severity Index for CAP: MDCalc; [Available from: <https://www.mdcalc.com/psi-port-score-pneumonia-severity-index-cap>].
129. qSOFA (Quick SOFA) Score for Sepsis: MDCalc; [Available from: <https://www.mdcalc.com/qsofa-quick-sofa-score-sepsis>].
